# Supplementary material for: H/D exchange in N-heterocycles catalysed by an NHC-supported ruthenium complex
Source: Royal Society of Chemistry journal article supplement (doi:10.1039/c9cy00561g), 2019-01-01
Supplement: c9cy00561g1.pdf [file c9cy00561g1.pdf]

## H/D exchange in *N*-heterocycles catalysed by an NHC-supported ruthenium complex

V. H. Mai,<sup>a</sup> O. B. Gadzhiev,<sup>b</sup> S. K. Ignatov,<sup>b</sup> and G. I. Nikonov<sup>a</sup>

<sup>a</sup> Chemistry Department, Brock University, 1812 Sir Isaac Brock Way, St. Catharines, ON L2S 3A1, Canada

<sup>b</sup> Chemistry Department, N. I. Lobachevsky State University of Nizhny Novgorod, Gagarin Avenue 23, 603950, Nizhny Novgorod, Russia

### Corresponding Author

\* Georgii Nikonov, gnikonov@brocku.ca

### Supporting Information

|       |                                                                                                                                      |    |
|-------|--------------------------------------------------------------------------------------------------------------------------------------|----|
| 1     | General Information .....                                                                                                            | 3  |
| 2     | Experimental Details .....                                                                                                           | 3  |
| 2.1   | Catalyst synthesis, general scheme. ....                                                                                             | 3  |
| 2.1.1 | General procedure for Cp systems ( <b>1</b> , <b>2</b> , <b>3</b> , <b>8</b> ):.....                                                 | 4  |
| 2.1.2 | General procedure for Cp* systems ( <b>7</b> , <b>9</b> ):.....                                                                      | 4  |
| 2.2   | Catalyst characterization:.....                                                                                                      | 4  |
|       | Cp*(IPr)RuH <sub>3</sub> ( <b>7</b> ) .....                                                                                          | 4  |
|       | Cp(IMes)RuH <sub>3</sub> ( <b>8</b> ) .....                                                                                          | 5  |
|       | Cp*(IMes)RuH <sub>3</sub> ( <b>9</b> ).....                                                                                          | 5  |
|       | Cp(IMes) <sub>2</sub> RuH ( <b>10</b> ).....                                                                                         | 5  |
| 2.3   | Catalytic H/D exchange reaction:.....                                                                                                | 6  |
| 3     | Selected NMR Spectra .....                                                                                                           | 6  |
| 3.1   | NMR spectra of new tris(hydride) ruthenium complexes .....                                                                           | 6  |
|       | Cp(IMes)RuH <sub>3</sub> .....                                                                                                       | 6  |
|       | Figure S1. <sup>1</sup> H NMR (600 MHz, C <sub>6</sub> D <sub>6</sub> ) of Cp(IMes)RuH <sub>3</sub> .....                            | 6  |
|       | Figure S2. <sup>1</sup> H- <sup>13</sup> C HSQC NMR (600 MHz, C <sub>6</sub> D <sub>6</sub> ) of Cp(IMes)RuH <sub>3</sub> .....      | 7  |
|       | Figure S3. <sup>13</sup> C{ <sup>1</sup> H} NMR spectrum (151 MHz, C <sub>6</sub> D <sub>6</sub> ) of Cp(IMes)RuH <sub>3</sub> ..... | 7  |
|       | Cp*(IPr)RuH <sub>3</sub> .....                                                                                                       | 8  |
|       | Figure S4. <sup>1</sup> H NMR (600 MHz, C <sub>6</sub> D <sub>6</sub> ) of Cp*(IPr)RuH <sub>3</sub> .....                            | 8  |
|       | Figure S5. <sup>1</sup> H- <sup>13</sup> C HSQC NMR (600 MHz, C <sub>6</sub> D <sub>6</sub> ) of Cp*(IPr)RuH <sub>3</sub> .....      | 8  |
|       | Figure S6. <sup>13</sup> C{ <sup>1</sup> H} NMR spectrum (151 MHz, C <sub>6</sub> D <sub>6</sub> ) of Cp*(IPr)RuH <sub>3</sub> ..... | 9  |
|       | Cp(IMes) <sub>2</sub> RuH.....                                                                                                       | 10 |

|                                                                                                                                                                                                                                                                        |    |
|------------------------------------------------------------------------------------------------------------------------------------------------------------------------------------------------------------------------------------------------------------------------|----|
| Figure S8. $^1\text{H}$ NMR (600 MHz, $\text{C}_6\text{D}_6$ ) of $\text{Cp}(\text{IMes})_2\text{RuH}$ .....                                                                                                                                                           | 10 |
| Figure S9. $^{13}\text{C}\{^1\text{H}\}$ NMR spectrum (151 MHz, $\text{C}_6\text{D}_6$ ) of $\text{Cp}(\text{IMes})_2\text{RuH}$ .....                                                                                                                                 | 11 |
| Figure S10. The overlap of $^1\text{H}$ NMR spectra of $\text{Cp}(\text{IMes})\text{RuH}_3$ (red) and $\text{Cp}(\text{IMes})_2\text{RuH}$ (green).....                                                                                                                | 11 |
| 3.2 Selected stacked NMR spectra to analyse the degree of deuteration in H/D exchange reactions. ....                                                                                                                                                                  | 12 |
| 3.2.1 Spectra showing the progress of H/D exchange: .....                                                                                                                                                                                                              | 12 |
| Toluene.....                                                                                                                                                                                                                                                           | 12 |
| Quinoline.....                                                                                                                                                                                                                                                         | 13 |
| Naphthalene .....                                                                                                                                                                                                                                                      | 14 |
| Acridine.....                                                                                                                                                                                                                                                          | 15 |
| Phenanthridine .....                                                                                                                                                                                                                                                   | 16 |
| 2,6 lutidine .....                                                                                                                                                                                                                                                     | 17 |
| Phenyl quinoline.....                                                                                                                                                                                                                                                  | 18 |
| Pyrazine.....                                                                                                                                                                                                                                                          | 19 |
| Figure S11. The NMR progress of catalytic H/D exchange reaction using $\text{Cp}(\text{IMes})_2\text{RuH}$ as catalyst and pyridine as substrate in $\text{C}_6\text{D}_6$ with ferrocene insert. ....                                                                 | 19 |
| Figure S12. The catalytic reaction with 0.1 mol % of $\text{Cp}(\text{IMes})_2\text{RuH}$ in $\text{C}_6\text{D}_6$ , with added pyridine, with ferrocene insert. ....                                                                                                 | 20 |
| 4 DFT calculation .....                                                                                                                                                                                                                                                | 21 |
| Table S1. Energies of transition states relative to isolated reactants ( $\text{CpRuHImes1}$ and $\text{CH}_4$ ).....                                                                                                                                                  | 21 |
| Figure S13. The transition state structure for the central attack with the branching in the reaction path (a), transition state in the branching in the reaction path (b), and the given comparison parental catalytic molecule (c). Bond lengths are given in Å. .... | 22 |
| Figure S14. The transition state structure for the lateral attack with the branching in the reaction path (a) and transition state in the branching in the reaction path (b). Bond lengths are given in Å.....                                                         | 22 |
| Figure S15. The transition state structure for the central (a) and lateral (b) attacks without branching in the reaction path. Bond lengths are given in Å. ....                                                                                                       | 22 |
| Figure S16. Transition states and ethane oxidative addition. Bond lengths are given in Å .....                                                                                                                                                                         | 25 |
| Figure S17. Central attack of $\text{CH}_4$ to $\text{Cp}(\text{L})(\text{H})\text{Ru}$ occurring without reaction path branching.....                                                                                                                                 | 24 |
| Table S2. Total ( $E_{\text{tot}}$ ) and relative ( $E_{\text{rel}}(\text{isolated reactants})$ ) energies for transition states and complexes in the ethane addition reaction.....                                                                                    | 25 |
| Figure S18. Transition states and ethane oxidative addition. Bond lengths are given in Å.....                                                                                                                                                                          | 25 |
| Figure S19 Transition states and intermediates for benzene oxidative addition. Bond lengths are given in Å. ....                                                                                                                                                       | 27 |
| Table S3. Total ( $E_{\text{tot}}$ ) and relative ( $E_{\text{rel}}(\text{isolated reactants})$ ) energies for transition states and complexes in the benzene addition reaction.....                                                                                   | 28 |
| Figure S20. Relative energy profile for pyridine addition reaction catalyzed by $\text{Cp}(\text{L})\text{RuH}$ for the channels 1a, 1b, 2, and 3. ....                                                                                                                | 30 |
| Figure S21. Relative energy profile for pyridine addition reaction catalyzed by $\text{Cp}(\text{L})\text{RuH}$ for the major and catalyst inhibition channels. The bond lengths are given in Å.....                                                                   | 31 |
| Figure S22. Bis(carbene) complex $\text{Cp}(\text{IMes})_2\text{RuH}$ (15).....                                                                                                                                                                                        | 32 |
| 5. References .....                                                                                                                                                                                                                                                    | 33 |

## 1 General Information

All manipulations were performed using conventional glove box or nitrogen-line Schlenk techniques. Solvents were pre-dried by using Grubbs-type purification columns and stored in ampoules equipped with a Teflon valve. Deuterated solvents were dried over sodium, potassium or  $\text{CaH}_2$  as appropriate, distilled under reduced pressure and stored in ampoules with a Teflon valve. NMR samples were prepared in New Era tubes equipped with J. Young-type Teflon valves. NMR spectra were obtained with Bruker DPX-400 and Bruker DPX-600 instruments ( $^1\text{H}$ : 400 and 600 MHz;  $^{13}\text{C}$ : 100.6 and 151 MHz) spectrometers at 298 K.  $^1\text{H}$  and  $^{13}\text{C}$  NMR spectra were referenced internally to residual protiosolvent ( $^1\text{H}$ ) or solvent ( $^{13}\text{C}$ ) resonances and are reported relative to tetramethylsilane ( $\delta=0$  ppm). Chemical shifts are quoted in  $\delta$ [ppm] and coupling constants in Hertz. IR spectra were recorded by using a PerkinElmer 1600 FTIR spectrometer as Nujol mulls between NaCl windows. All chemicals were purchased from Sigma–Aldrich and Alfa Aesar were used without further purification.  $\text{C}_6\text{D}_6$  was purchased from Cambridge Isotope Laboratories and were dried over K/Na alloy before use. Complexes  $\text{Cp}(\text{IPr})\text{RuH}_3$  (**1**),  $\text{Cp}(\text{PPh}_3)\text{RuH}_3$  (**2**),  $\text{Cp}(\text{PiPr}_3)\text{RuH}_3$  (**3**),  $\text{Cp}(\text{IPr})\text{RuH}_2(\text{SiH}_2\text{Ph})$  (**4**),  $\text{Cp}(\text{IPr})\text{RuH}_2(\text{SiHMePh})$  (**5**)  $\text{Cp}(\text{IPr})\text{RuH}_2(\text{SiMeCl}_2)$  (**6**) were synthesized by literature procedures.<sup>1-3</sup>

## 2 Experimental Details

### 2.1 Catalyst synthesis, general scheme.

For Cp based catalysts L = IPr, IMes, PiPr<sub>3</sub>, PPh<sub>3</sub>

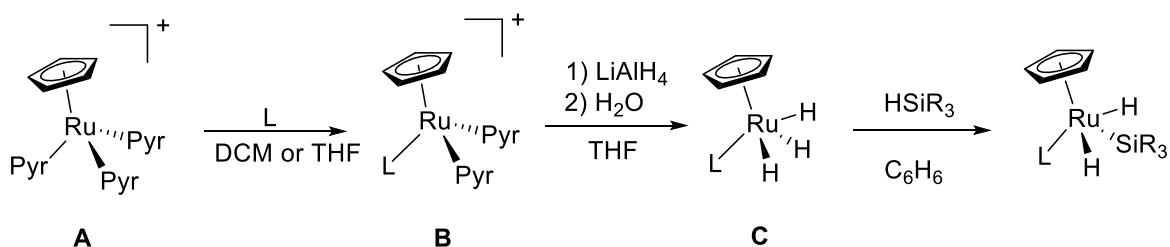

For Cp\* based catalysts L = IPr, IMes

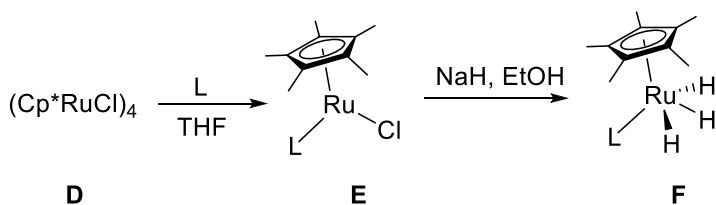

Scheme S1. Preparation of polyhydride half-sandwich ruthenium complexes.

$\text{Cp}^*(\text{IPr})\text{RuH}_3$  (**7**),  $\text{Cp}(\text{IMes})\text{RuH}_3$  (**8**),  $\text{Cp}^*(\text{IMes})\text{RuH}_3$  (**9**) were prepared by applying procedures developed for **1-3**.<sup>1,2,3</sup>

### 2.1.1 General procedure for Cp systems (1, 2, 3, 8):

1) To a solution of [CpRu(pyr)<sub>3</sub>][PF<sub>6</sub>] (**A**) (0.5 mmol) in 20 mL of dichloromethane was added NHC carbene (0.5 mmol) (NHC = IPr, IMes, IPr). After stirring at room temperature for 8h, the resulting solution was dried to yield [Cp(NHC)Ru(pyr)<sub>2</sub>][PF<sub>6</sub>] (**B**) as a brownish-yellow, air sensitive solid. This compound was used for the next steps without any further purification.

2) To a solution of [Cp(NHC)Ru(pyr)<sub>2</sub>][PF<sub>6</sub>] (**B**, 0.36 mmol) in 20 mL of isopropanol was added 1.2 equivalent of KOtBu (0.43 mmol). After stirring at room temperature for 3 h, the resulting solution was dried, extracted by hexane, and then re-crystallized from a mixture of toluene/hexane (1:3) to give the target Cp(NHC)RuH<sub>3</sub> (**C**).

### 2.1.2 General procedure for Cp\* systems (7, 9):

1) To a solution of [Cp\*RuCl]<sub>4</sub> (**D**) (0.5 mmol) in 20 mL THF was added 0.5 mmol of NHC (NHC = IPr, IMes). After stirring at room temperature for 24 h, the resulting purple solution was dried to yield the corresponding unsaturated 16e Cp\*(NHC)RuCl (**E**) as a brownish-yellow, air sensitive solid. This new compound was used in the next step without any further purification.

2) To a solution of Cp\*(NHC)RuCl (**E**) (0.4 mmol) in 20 mL of ethanol was added 1.2 equivalent of NaH (0.48 mmol). After stirring at room temperature for 12 h, the resulting solution was dried, the residue was extracted by hexane, and then re-crystallized from a mixture of toluene/hexane (1:3) to give the corresponding Cp\*(NHC)RuH<sub>3</sub> (**F**).

## 2.2 Catalyst characterization:

### Cp\*(IPr)RuH<sub>3</sub> (7)

To a solution of 0.26 g (0.40 mmol) of Cp\*(IPr)RuCl in 20 mL in ethanol was added 1.2 equivalent of NaH (0.012g, 0.48 mmol). After stirring at room temperature for 12h, the resulting solution was dried, extracted by hexane, and then re-crystallized at room temperature from 8 mL mixture of toluene/hexane (3:1) by slow evaporation to yield 0.15 g (60%) of Cp\*(IPr)RuH<sub>3</sub>. IR (Nujol):  $\nu(\text{Ru-H}) = 2030 \text{ cm}^{-1}$ . <sup>1</sup>H NMR (600 MHz, C<sub>6</sub>D<sub>6</sub>):  $\delta$  -9.53 (s, 3H, RuH<sub>3</sub>), 1.07 (d  $J(\text{H-H})=6.7 \text{ Hz}$ , 12 H, CH<sub>3</sub> of <sup>*i*</sup>Pr), 1.52 (d,  $J(\text{H-H})=6.7 \text{ Hz}$ , 12 H, CH<sub>3</sub> of <sup>*i*</sup>Pr), 1.8 (s, 15 H, CH<sub>3</sub> of Cp\*) 2.93 (sep,  $J(\text{H-H})=6.7 \text{ Hz}$ , 4H, CH of <sup>*i*</sup>Pr), 6.44 (s, 2 H, NCH), 7.21-7.31 (m, 6H, C<sub>6</sub>H<sub>3</sub>). <sup>13</sup>C NMR (151 MHz, C<sub>6</sub>D<sub>6</sub>): 12.6 (s, CH<sub>3</sub> of Cp\*),  $\delta$  28.5 (s, CH<sub>3</sub>), 28.8 (s, CH(CH<sub>3</sub>)<sub>2</sub>), 93.4 (s, C ring of Cp\*), 122.6 (s, NCH), 124.2 (*m*-C, C<sub>6</sub>H<sub>3</sub>), 129.2 (*p*-C, C<sub>6</sub>H<sub>3</sub>), 140.3 (s, *o*-C<sub>6</sub>H<sub>3</sub>), 146.7 (s, *N*-C<sub>6</sub>H<sub>3</sub>), 197.13 (Ru-CN<sub>2</sub>).

Anal. Cal. for  $C_{37}H_{55}RuN_2$  (628.92): C, 70.66; H, 8.81; N, 4.45. Found: C, 70.27, H, 8.71; N, 4.06.

#### *Cp(IMes)RuH<sub>3</sub>* (8)

To 0.230 g (0.30 mmol) of  $[Cp(IMes)Ru(pyr)_2][PF_6]$  in 20 mL in isopropanol solution was added 0.040 g (0.36 mmol) of  $KO^tBu$ . After stirring at room temperature for 3h, the solution was dried, extracted by hexane, and then re-crystallized at room temperature from a 5 mL mixture of toluene/hexane (2 : 3 v/v) by slow evaporation to give  $Cp(IMes)RuH_3$  as a hexane solvate. Yield: 0.146 g (87%). IR (Nujol):  $\nu(Ru-H) = 2016\text{ cm}^{-1}$ .  $^1H$  NMR (600 MHz,  $C_6D_6$ ):  $\delta$  -9.92 (s, 3H, *RuH*), 2.12 (s, 12H, 2 ortho  $CH_3$  of mesityl), 2.13 (s, 6H, 1 para  $CH_3$  of mesityl), 4.57 (s, 5H, Cp), 6.12 (s, 2H, NCH), 6.8 (s, 4H,  $C_6H_2$ ).  $^{13}C$  NMR (151 MHz,  $C_6D_6$ ):  $\delta$  18.44 (s, *o*- $CH_3$  of mesityl), 20.89 (*p*- $CH_3$  of mesityl), 81.0 (*C* ring of Cp), 120.2 (NCH), 129.2 (s, *m*- $C_6H_2$ ), 136.25 (s, *p*- $C_6H_2$ ), 137.9 (s, *o*- $C_6H_2$ ), 139.2 (s, *N*- $C_6H_2$ ); 193.4 (Ru-CN<sub>2</sub>).

Anal. Cal. for  $Cp(IMes)RuH_3 \cdot \text{hexane}$ ,  $C_{32}H_{46}RuN_2$  (559.8): C, 68.66; H, 8.28; N, 5.00. Found: C, 68.60, H, 8.55; N, 4.99.

#### *Cp\*(IMes)RuH<sub>3</sub>* (9)

Preparation and characterization of **9** have been reported: A. L. Jones, G. S. McGrady, P. Sirsch, J. W. Steed, *Chem. Commun.* **2005**, 5994.

IR (Nujol):  $\nu(Ru-H) = 2023\text{ cm}^{-1}$ .  $^1H$  NMR (600 MHz,  $C_6D_6$ ):  $\delta$  -9.39 (s, 3H, *RuH*), 1.84 (s, 15H,  $CH_3$  of Cp\*), 2.13 (s, 12H, 2 ortho  $CH_3$  of mesityl), 2.19 (s, 6H, 1 para  $CH_3$  of mesityl), 6.12 (s, 2H, NCH), 6.88 (s, 4H,  $C_6H_2$ ).  $^{13}C$  NMR (151 MHz,  $C_6D_6$ ):  $\delta$  12.5 (s,  $CH_3$  of Cp\*), 18.9 (s, *o*- $CH_3$  of mesityl), 20.9 (*p*- $CH_3$  of mesityl), 78.9 (*C* ring of Cp\*), 120.5 (NCH), 129.2 (s, *m*- $C_6H_2$ ), 135.9 (s, *p*- $C_6H_2$ ), 194.3 (Ru-CN<sub>2</sub>).

#### *Cp(IMes)<sub>2</sub>RuH* (10)

To a solution of  $Cp(IMes)RuH_3$  (0.018 g, 0.04 mmol) in 5 mL in benzene was added 3 equivalents of IMes (0.034 mg, 0.12 mmol). After stirring at 50°C for 24h, the resulting solution was dried. The residue was extracted by ether, filtered through a Celite column, and then re-crystallized from a mixture of diethyl ether and hexane (4:1, v/v) to give the corresponding  $Cp(IMes)_2RuH$ .

IR (Nujol):  $\nu(Ru-H) = 2012\text{ cm}^{-1}$ .  $^1H$  NMR (600 MHz,  $C_6D_6$ )  $\delta$  -11.93 (s, 1H, *RuH*), 2.11 (s, 12H, 1 ortho  $CH_3$  of mesityl), 2.15 (s, 12H, 1 ortho  $CH_3$  of mesityl), 2.25 (s, 12H, 1 para  $CH_3$  of mesityl), 4.29 (s, 5H, Cp), 6.21 (s, 4H, NCH), 6.76 (s, 4H, *m*- $C_6H_2$ ), 6.86 (s, 4H, *m*- $C_6H_2$ ).  $^{13}C$  NMR (151 MHz,  $C_6D_6$ ):  $\delta$  14.1 (s, *o*- $CH_3$  of mesityl), 18.9 and 18.3 (s, *o*- $CH_3$  of mesityl), 20.9 and 22.8 (*p*- $CH_3$  of mesityl), 31.8 (*p*- $CH_3$  of mesityl), 82.4 (*C* ring of Cp), 123.1 (NCH), 129.3 (NCH), 129.4 (NCH), 136.7 (s, *m*- $C_6H_2$ ), 137.2 (s, *m*- $C_6H_2$ ), 138.4 (s, *p*- $C_6H_2$ ), 139.2 (s, *p*- $C_6H_2$ ), 159.5 (s, *N*- $C_6H_2$ ); 186.2.6 (Ru-CN<sub>2</sub>). 203.6 (Ru-CN<sub>2</sub>).

### 2.3 Catalytic H/D exchange reaction:

Stock solutions of **1**, **2**, **3**, **7**, **8**, **9** and **10** were prepared in C<sub>6</sub>D<sub>6</sub> before use. Substrates were added to NMR tubes in a glove box. The degree of deuteration was monitored by <sup>1</sup>H-NMR.

## 3 Selected NMR Spectra

### 3.1 NMR spectra of new tris(hydride) ruthenium complexes

#### Cp(IMes)RuH<sub>3</sub>

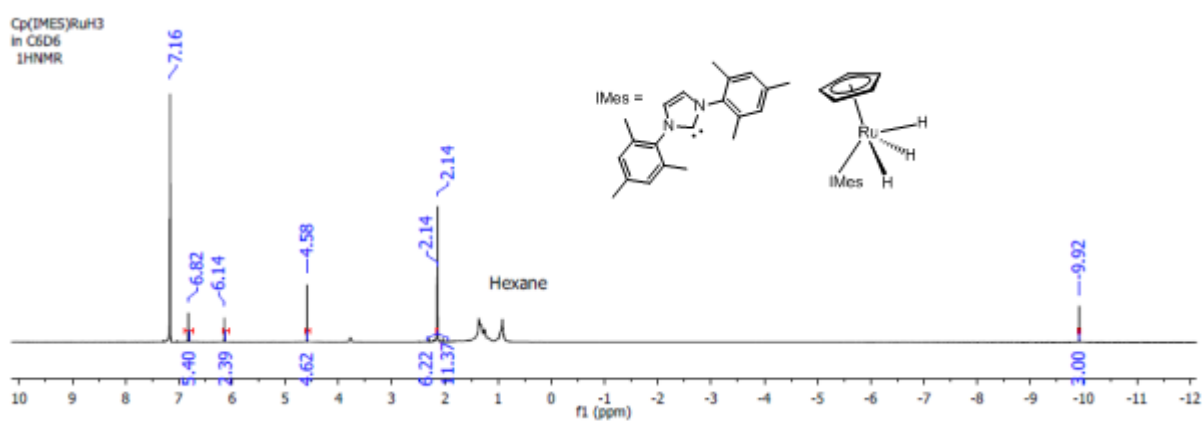

Figure S1. <sup>1</sup>H NMR (600 MHz, C<sub>6</sub>D<sub>6</sub>) of Cp(IMes)RuH<sub>3</sub>.

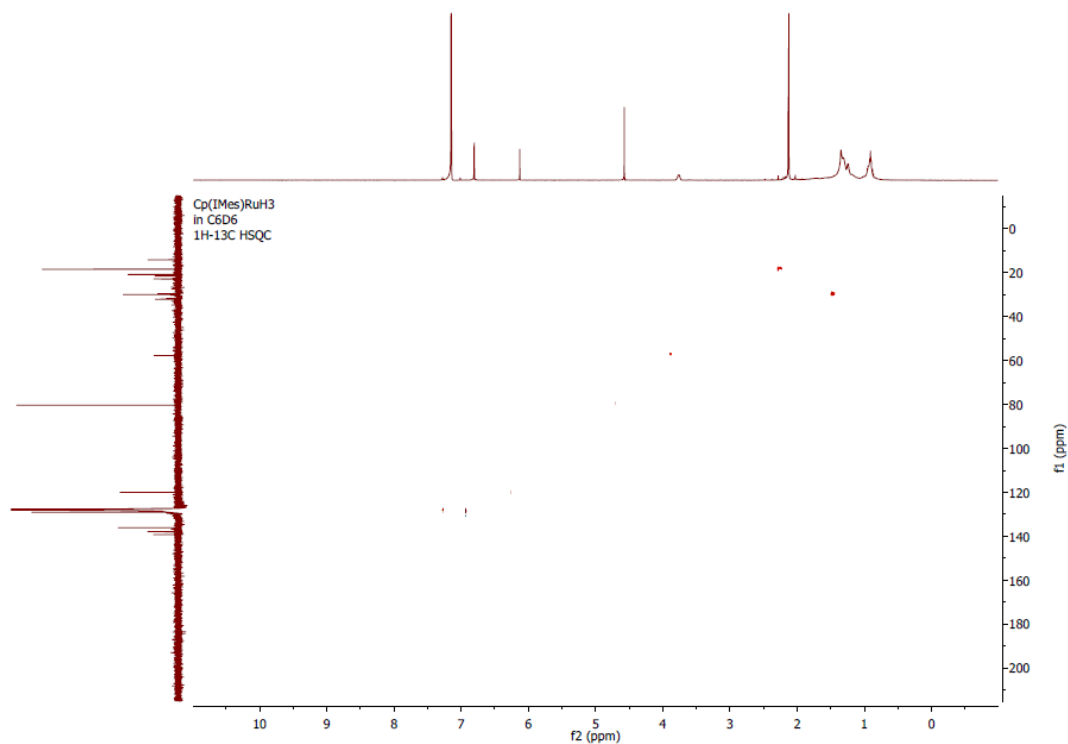

Figure S2. <sup>1</sup>H-<sup>13</sup>C HSQC NMR (600 MHz, C<sub>6</sub>D<sub>6</sub>) of Cp(IMes)RuH<sub>3</sub>.

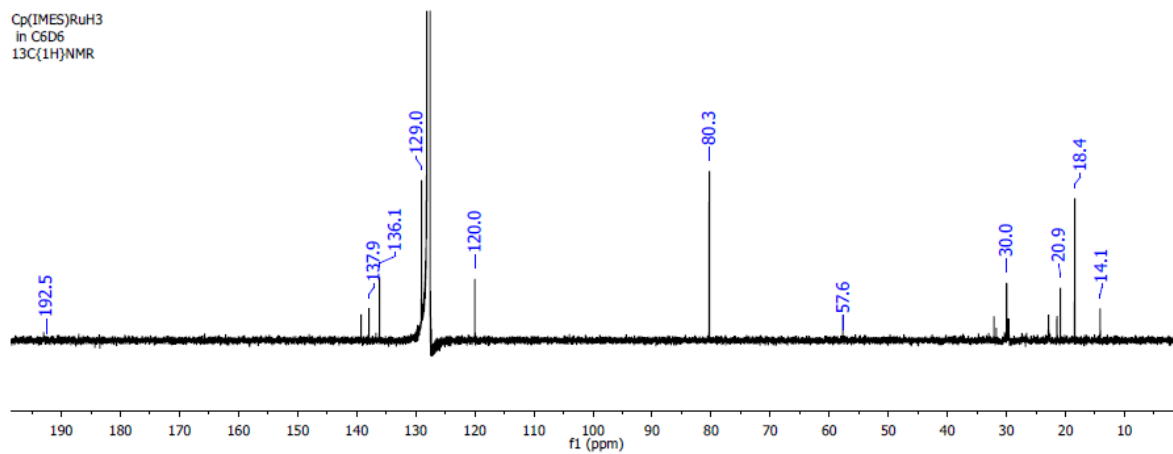

Figure S3. <sup>13</sup>C{<sup>1</sup>H} NMR spectrum (151 MHz, C<sub>6</sub>D<sub>6</sub>) of Cp(IMes)RuH<sub>3</sub>.

# $Cp^*(IPr)RuH_3$

$^1H$  NMR spectra of  $Cp^*(IPr)RuH_3$  in  $C_6D_6$

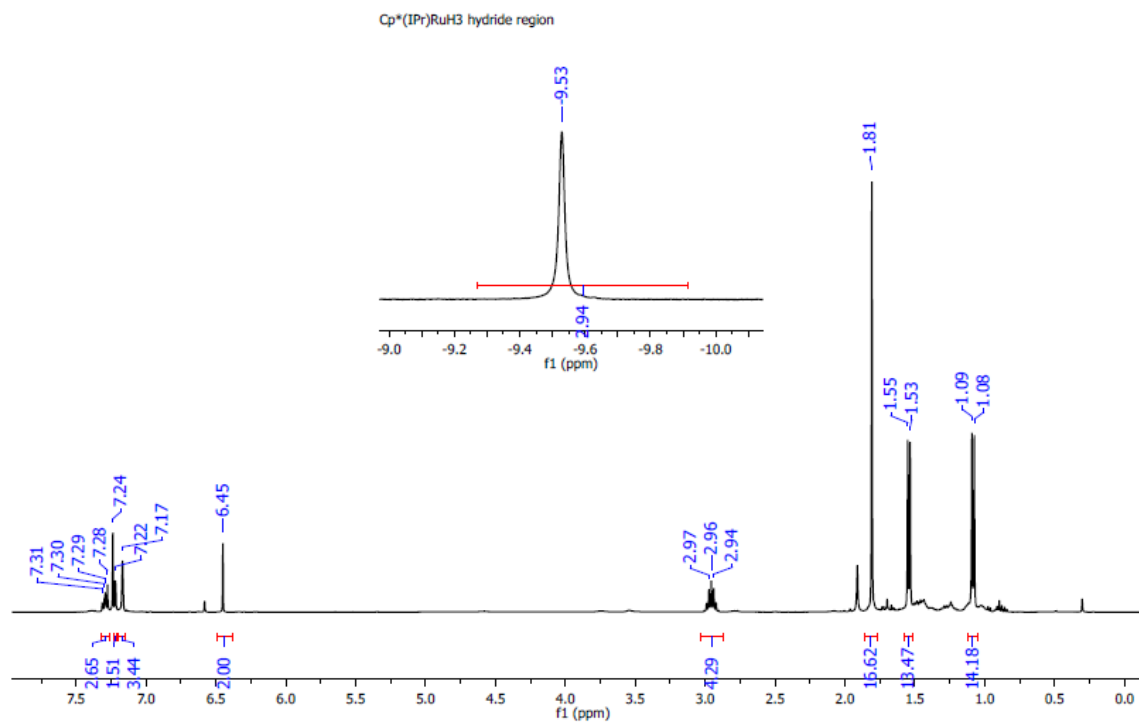

Figure S4.  $^1H$  NMR (600 MHz,  $C_6D_6$ ) of  $Cp^*(IPr)RuH_3$ .

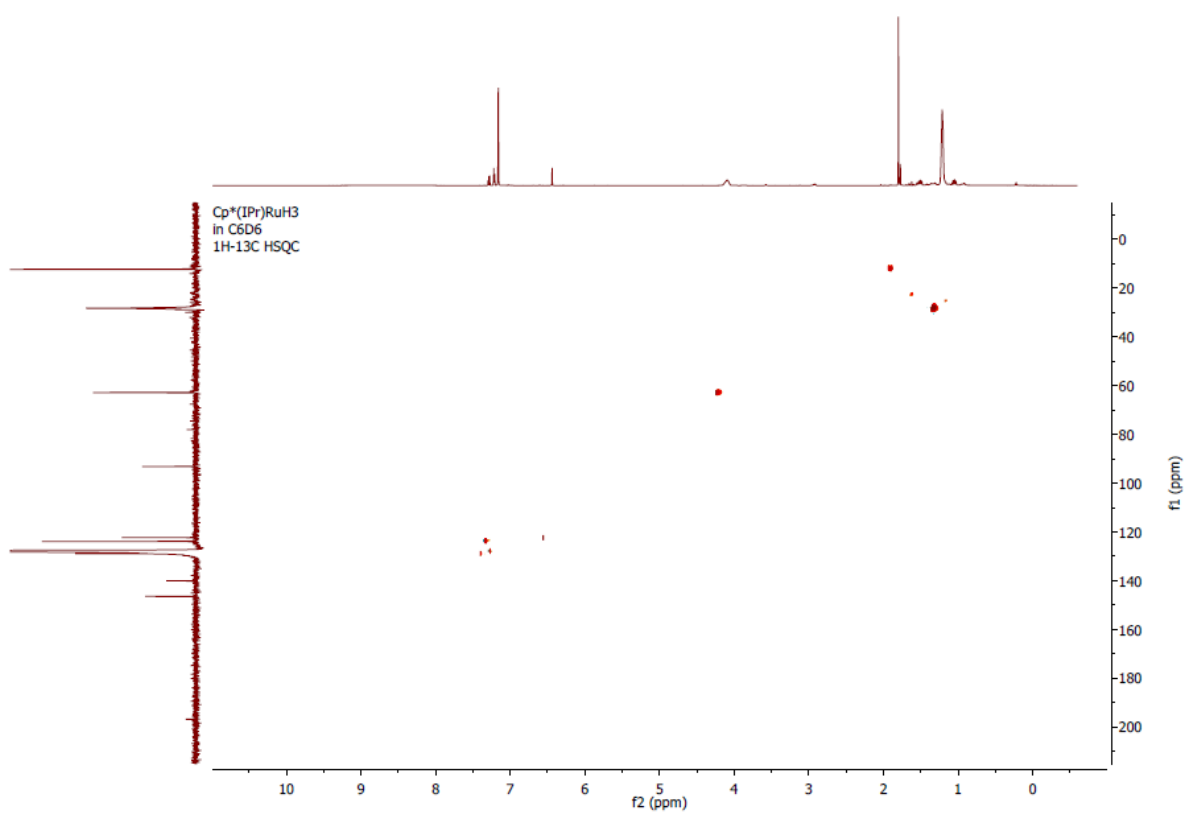

Figure S5.  $^1H$ - $^{13}C$  HSQC NMR (600 MHz,  $C_6D_6$ ) of  $Cp^*(IPr)RuH_3$ .

S



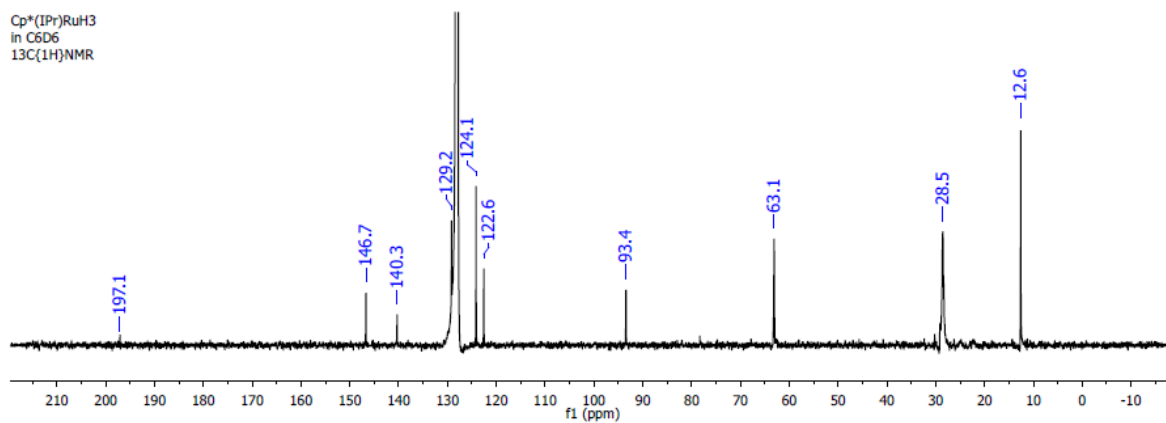

Figure S6. <sup>13</sup>C{<sup>1</sup>H} NMR spectrum (151 MHz, C<sub>6</sub>D<sub>6</sub>) of Cp\*(IPr)RuH<sub>3</sub>.

$Cp(IMes)_2RuH$

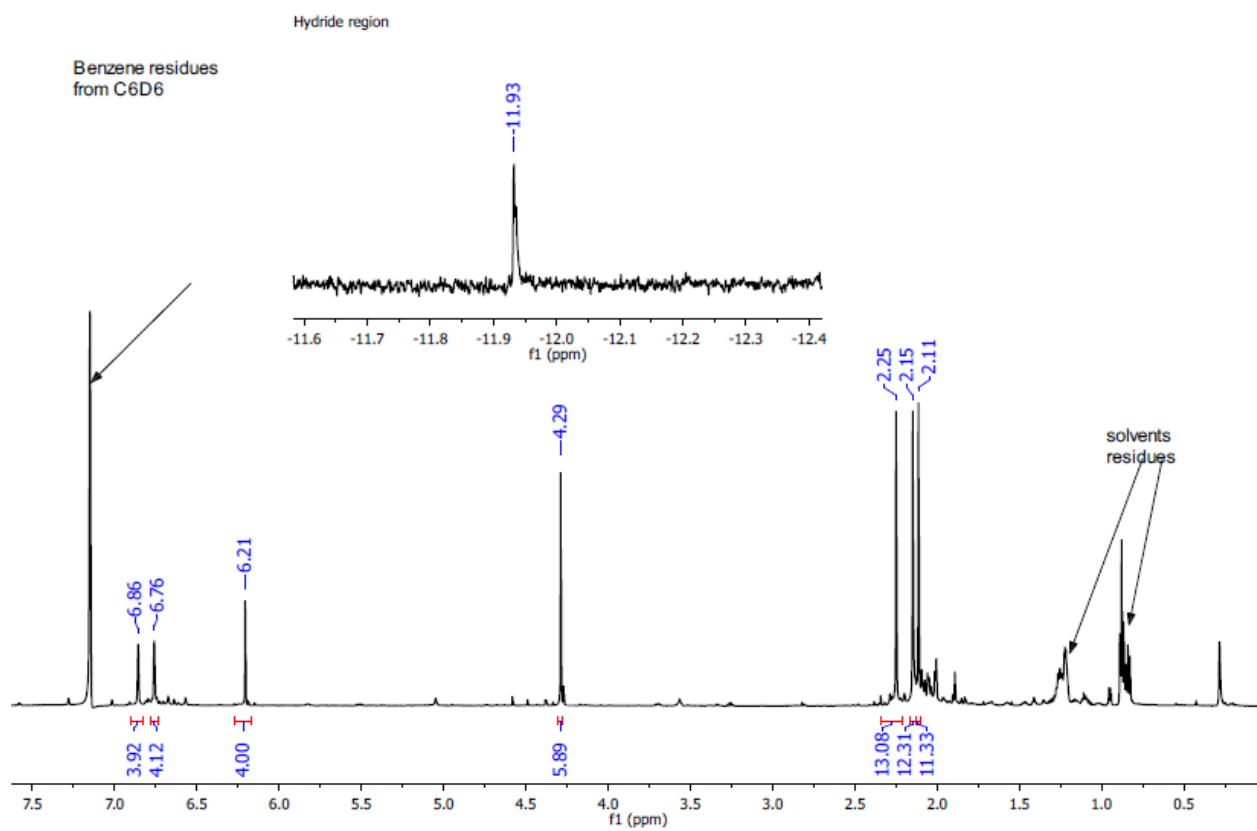

Figure S8.  $^1H$  NMR (600 MHz,  $C_6D_6$ ) of  $Cp(IMes)_2RuH$ .

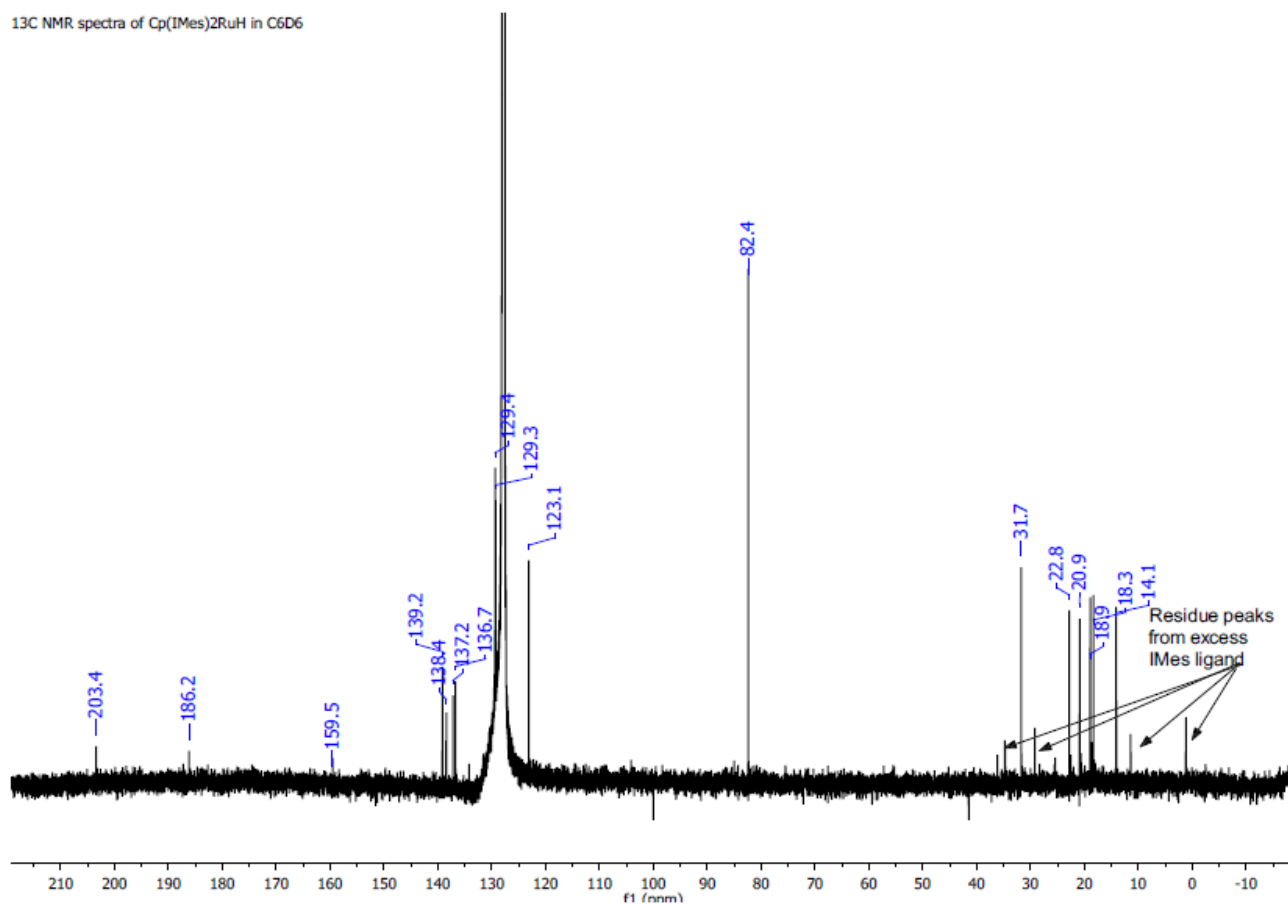

Figure S9.  $^{13}\text{C}\{^1\text{H}\}$  NMR spectrum (151 MHz,  $\text{C}_6\text{D}_6$ ) of  $\text{Cp}(\text{IMes})_2\text{RuH}$ .

Overlap of  $^1\text{H}$  NMR spectra of  $\text{Cp}(\text{IMes})\text{RuH}_3$  (red) and  $\text{Cp}(\text{IMes})_2\text{RuH}$  (green)

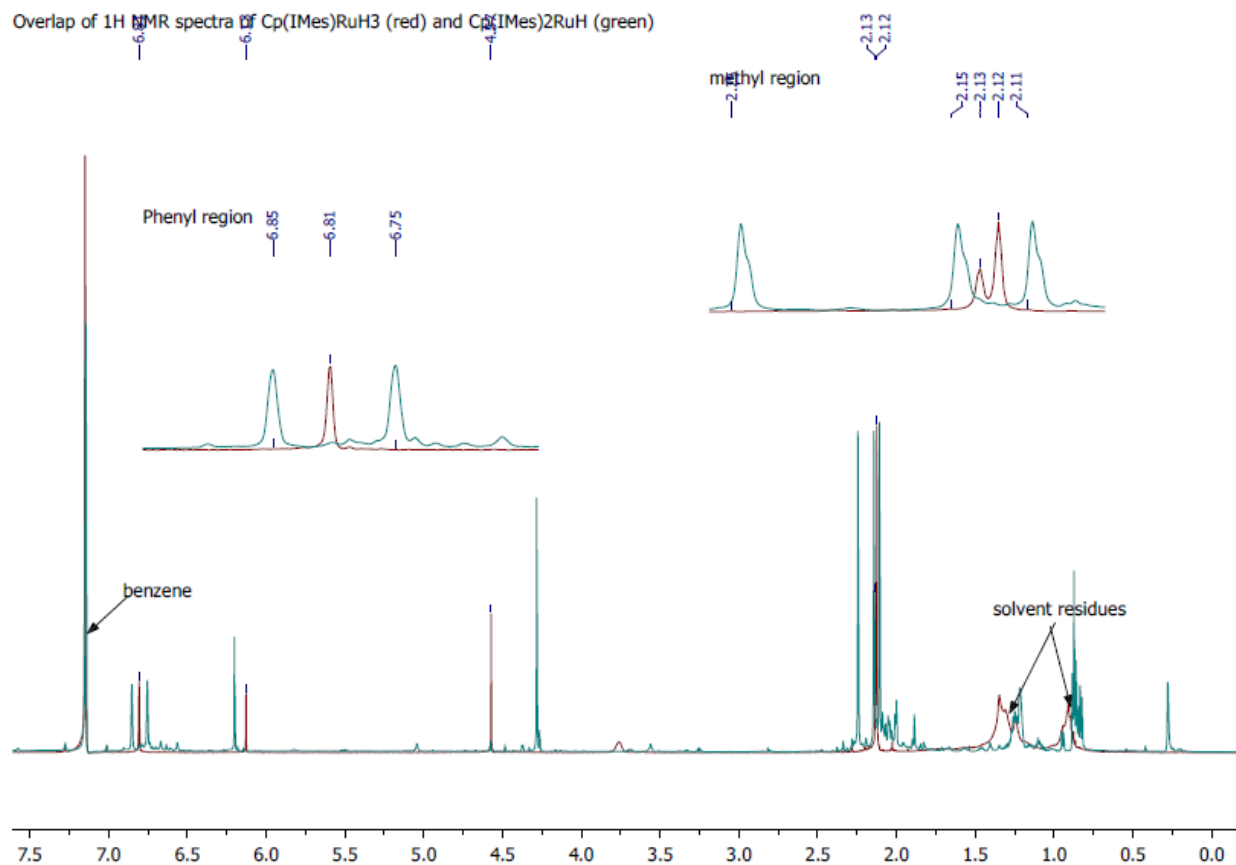

Figure S10. The overlap of  $^1\text{H}$  NMR spectra of  $\text{Cp}(\text{IMes})\text{RuH}_3$  (red) and  $\text{Cp}(\text{IMes})_2\text{RuH}$  (green).

### 3.2 Selected stacked NMR spectra to analyse the degree of deuteration in H/D exchange reactions.

#### 3.2.1 Spectra showing the progress of H/D exchange:

##### Toluene

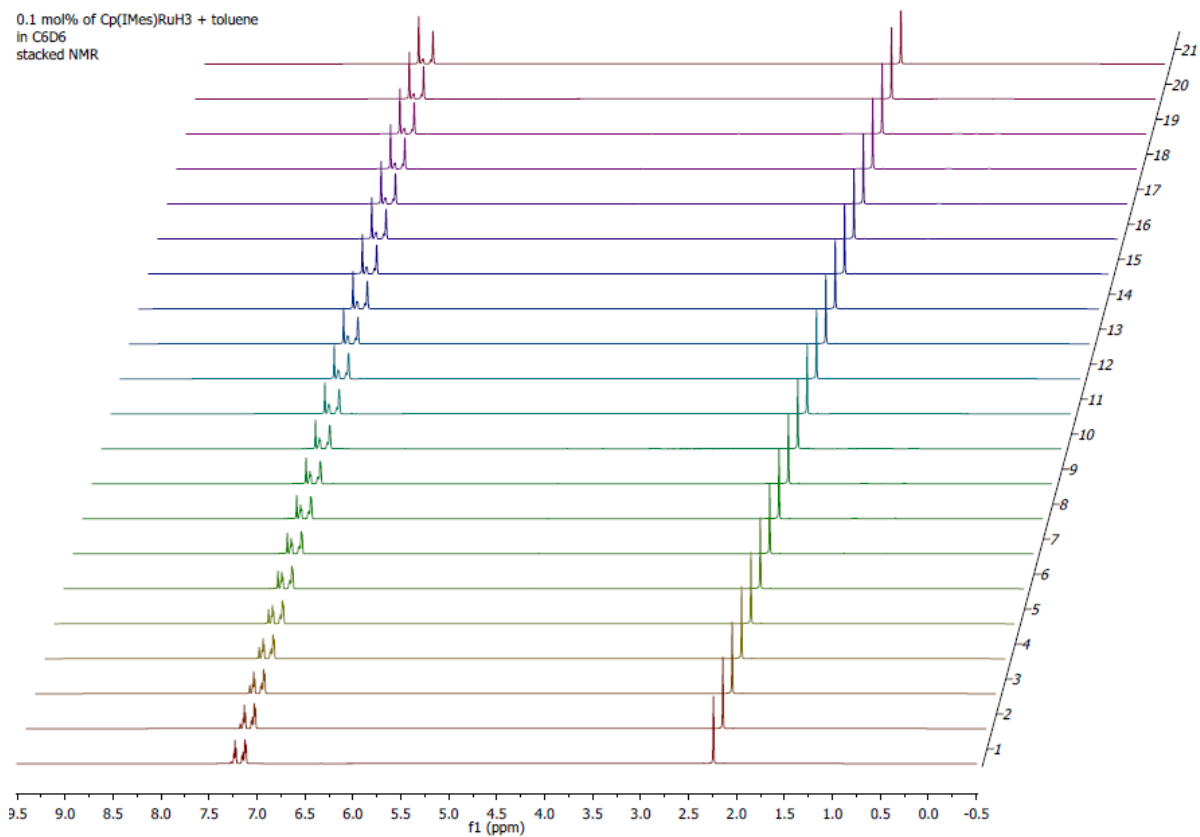

# Quinoline

0.1 mol% of Cp(1Mes)RuH3  
in C6D6 + quinoline in C6D6  
stacked NMR

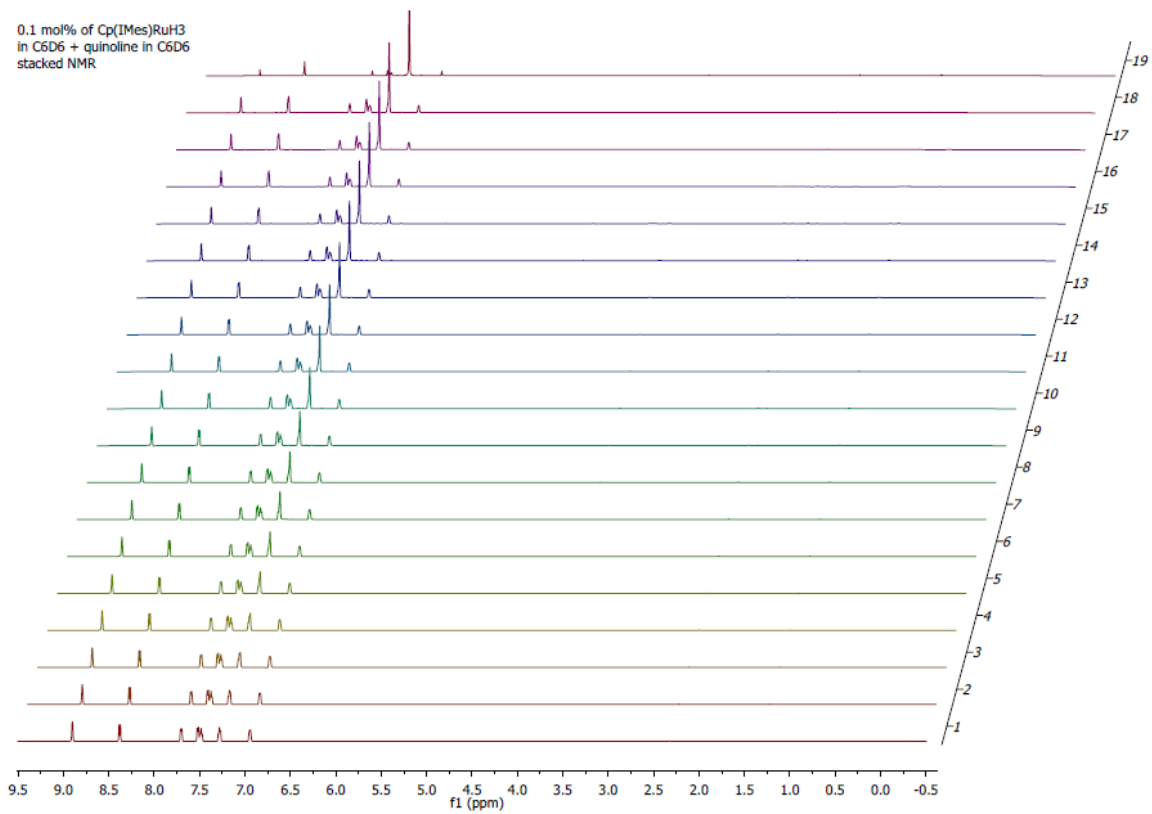

# Naphthalene

0.1 mol% of Cp(IMes)RuH3 + naphthalene  
in C6D6  
stacked NMR

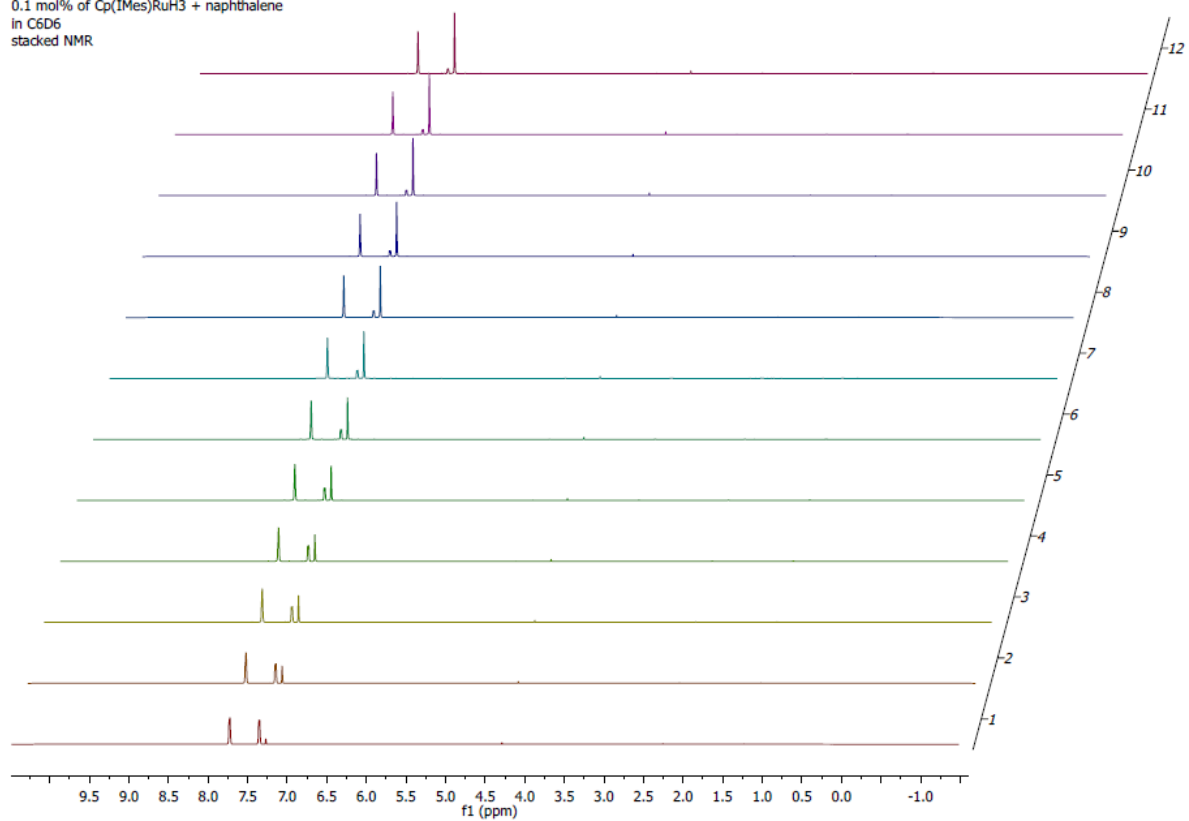

# Acridine

0.1 mol% of Cp\*(IMes)RuH<sub>3</sub> + acridine  
in C<sub>6</sub>D<sub>6</sub>  
stacked NMR

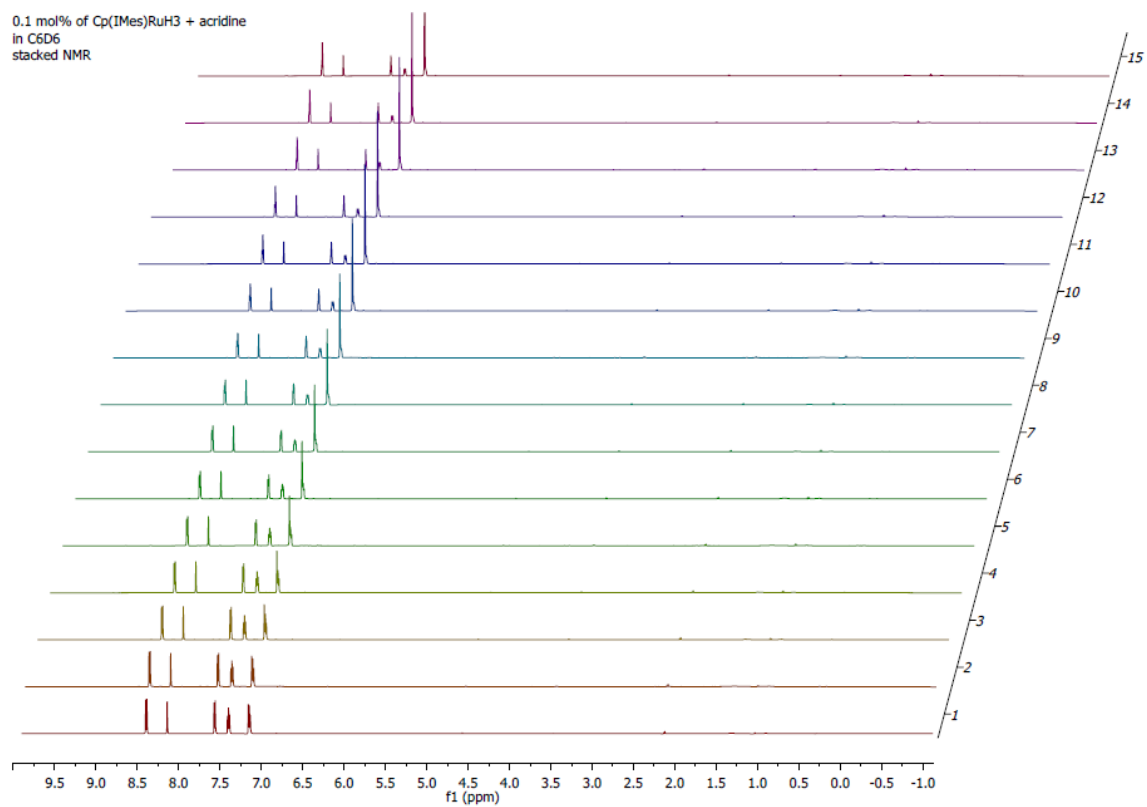

# Phenanthridine

0.1 mol% of Cp\*(IMes)RuH<sub>3</sub> + phenanthridine  
in C<sub>6</sub>D<sub>6</sub>  
stacked NMR

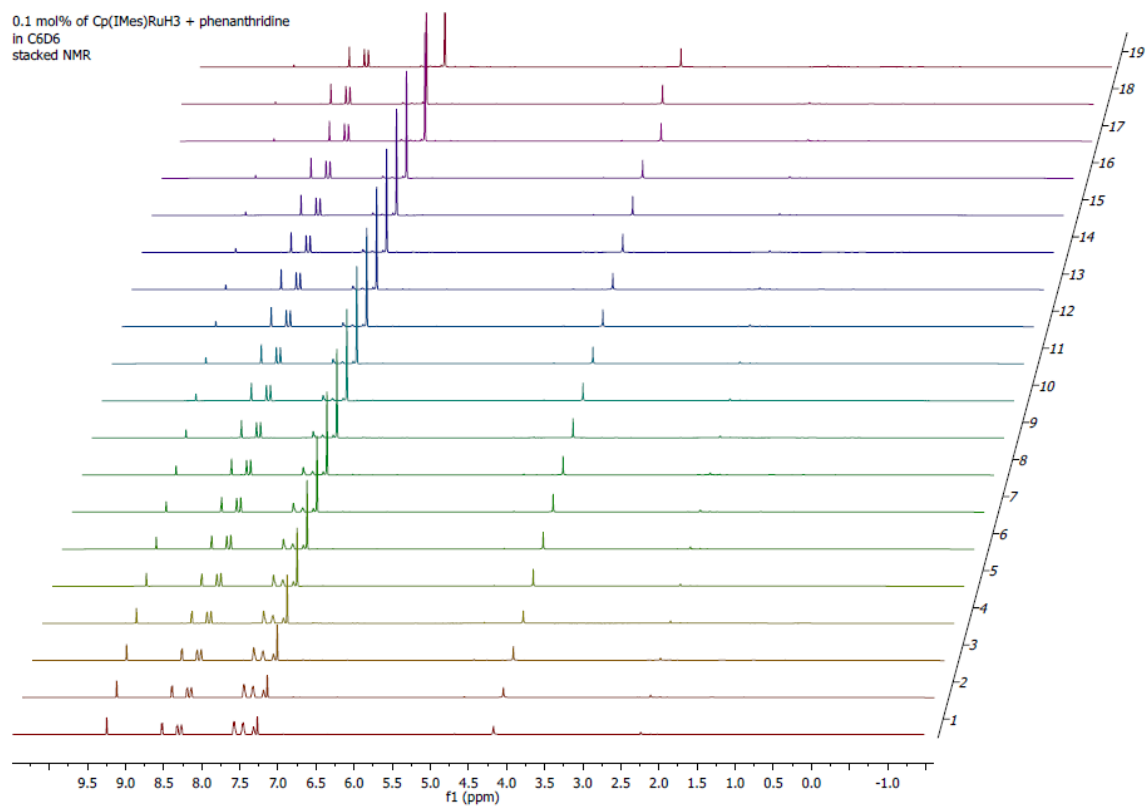



## 2,6 lutidine

0.1 mol% of Cp\*(Mes)RuH<sub>3</sub> + 2,6 lutidine  
in C<sub>6</sub>D<sub>6</sub>  
stacked NMR

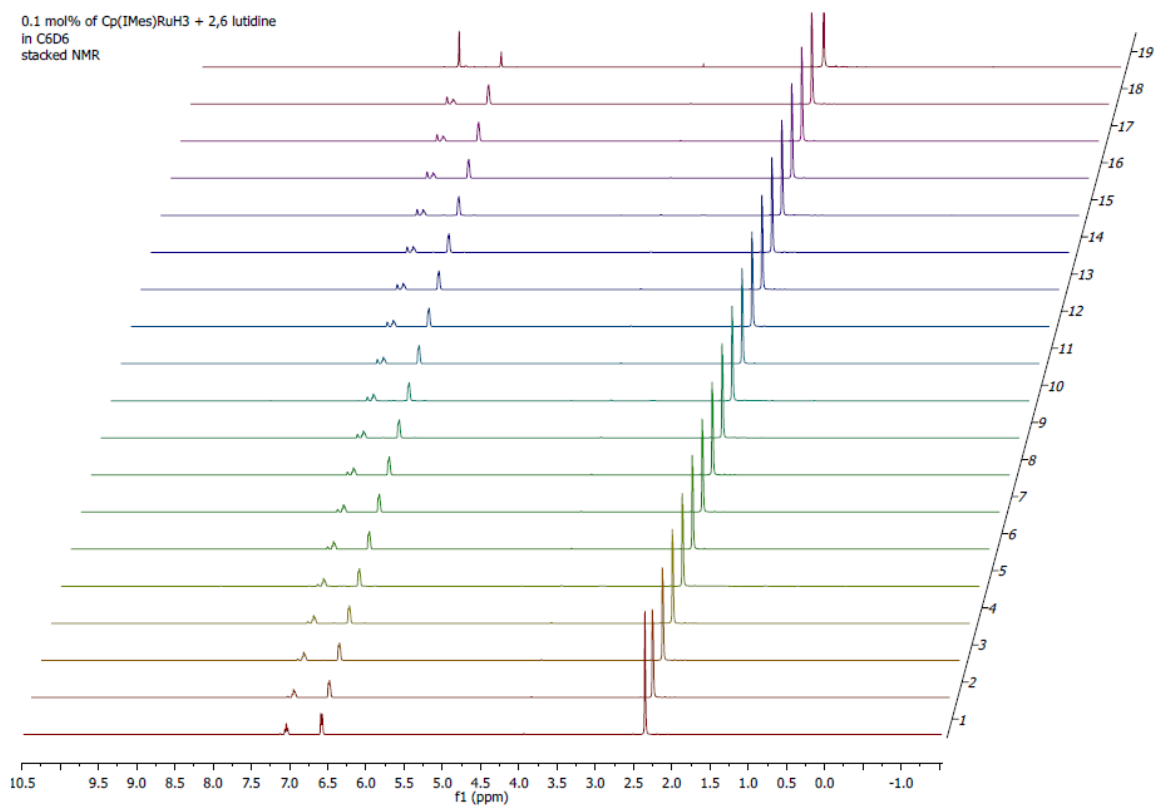

# Phenyl quinoline

0.1 mol% of Cp\*(IMes)RuH3 + phenylquinoline  
in C6D6  
stacked NMR

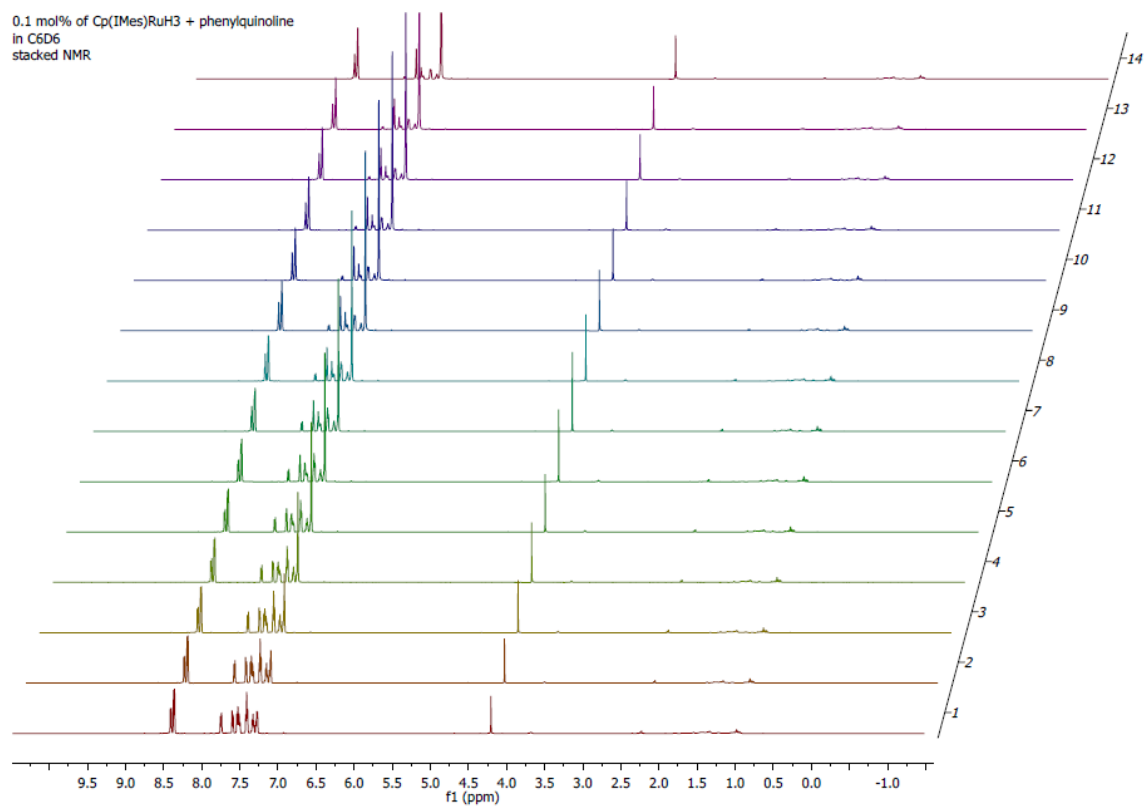

# Pyrazine

0.1 mol % of Cp(IMes)H3 + pyrazine  
in C6D6  
stacked NMR

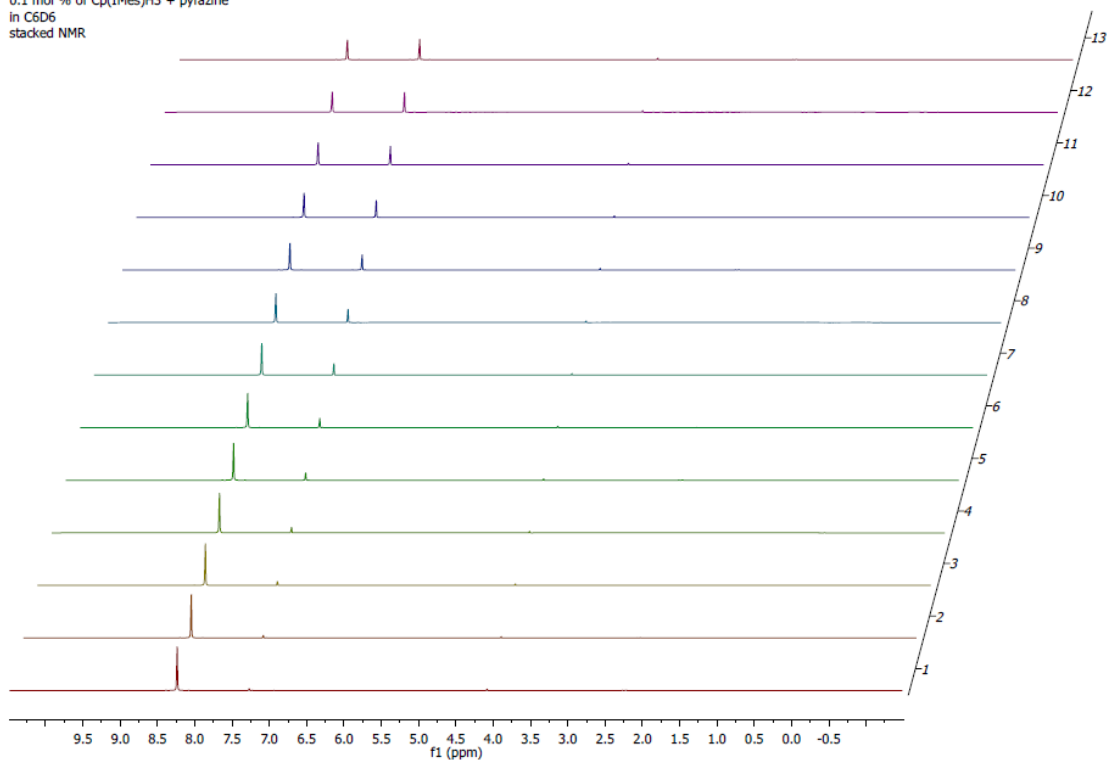

the NMR  
progress of the  
catalytic H/D  
exchange  
reaction using  
Cp(IMes)2RuH  
as catalyst (0.1  
mol%) and  
pyridine as  
substrate in  
C6D6 with  
ferrocene insert

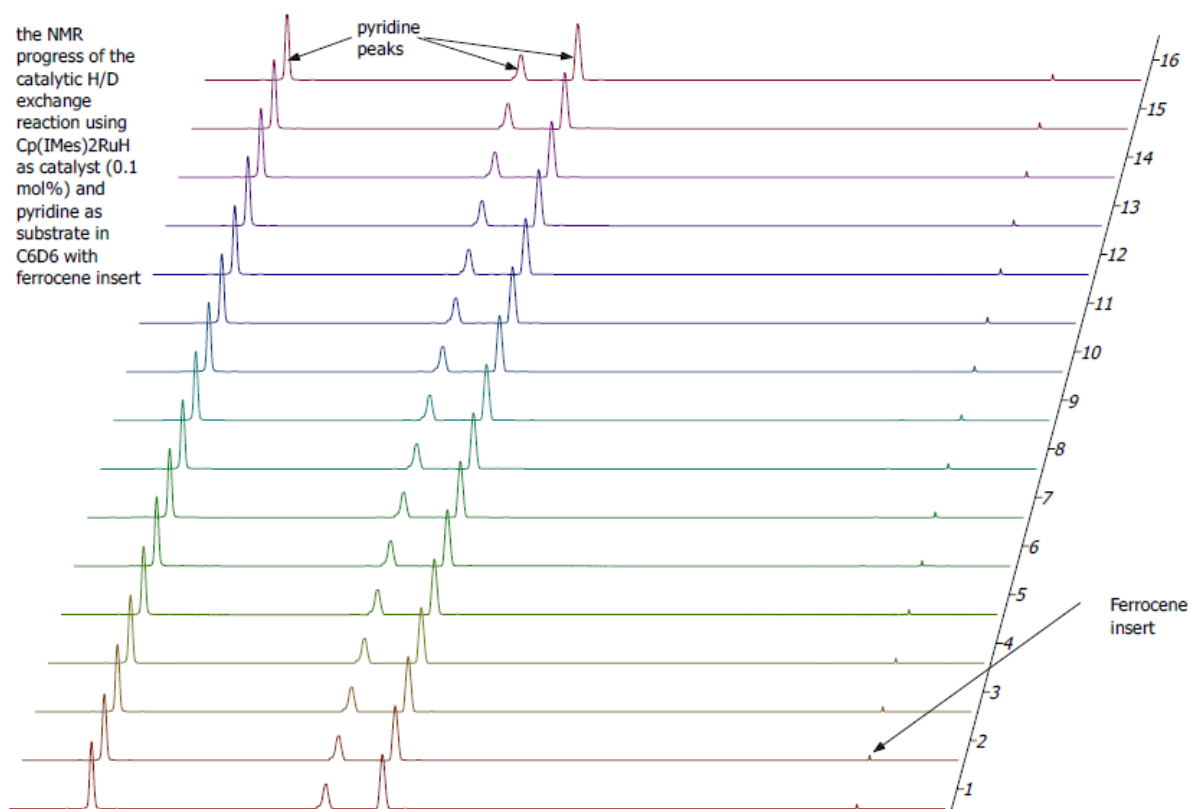

Figure S11. The NMR progress of catalytic H/D exchange reaction using Cp(IMes)<sub>2</sub>RuH as catalyst and pyridine as substrate in C<sub>6</sub>D<sub>6</sub> with ferrocene insert.

0.1% of Cp(IMes)<sub>2</sub>RuH in C<sub>6</sub>D<sub>6</sub>,  
with added pyridine 5m at Rt,  
with ferrocene insert

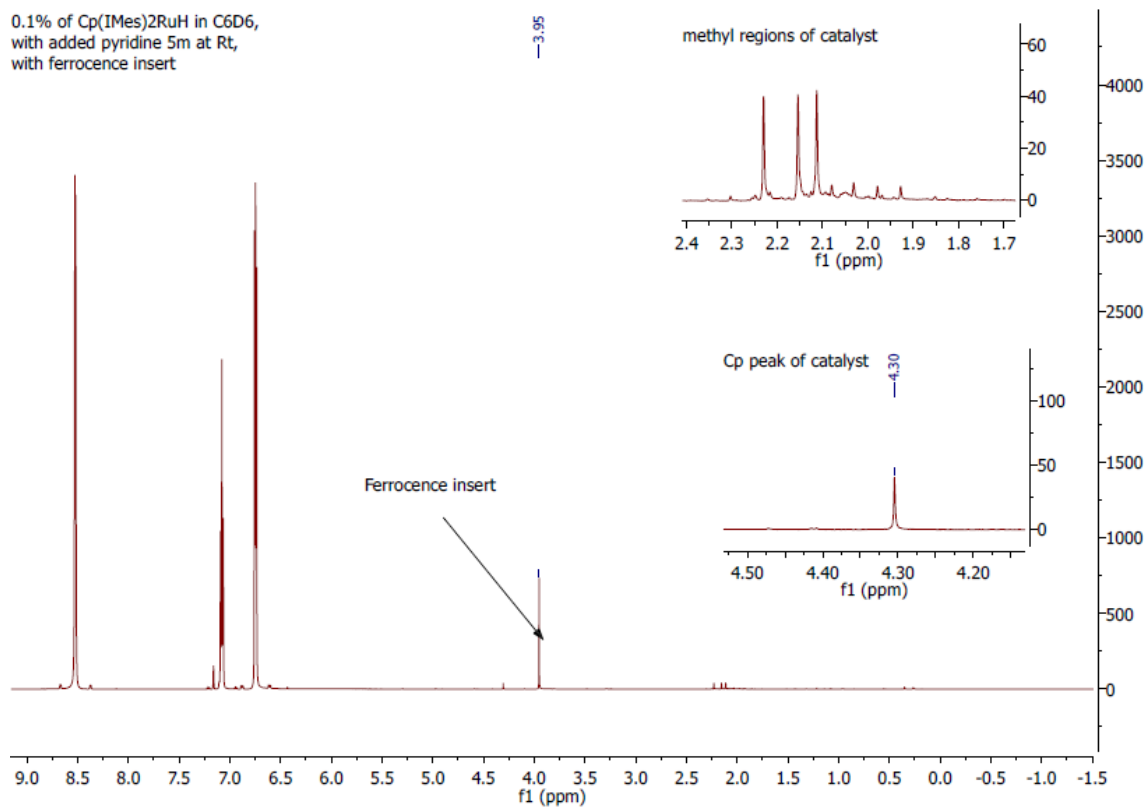

Figure S12. The catalytic reaction with 0.1 mol % of Cp(IMes)<sub>2</sub>RuH in C<sub>6</sub>D<sub>6</sub>, with added pyridine, with ferrocene insert.

## 4 DFT calculation

All calculations were performed with Gaussian 03.<sup>11</sup>

C-H activation in methane, ethane, benzene, and pyridine was studied.

1) For methane, two paths, with the lateral and central attacks, were revealed (Table S1 and Figure S13). It is interesting, that the topology of the PES for the C-H activation step in the both the lateral and central attacks is quite complex and involves bifurcation points and the corresponding reaction paths branching as well as non-branching paths.

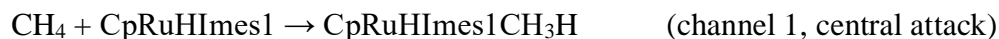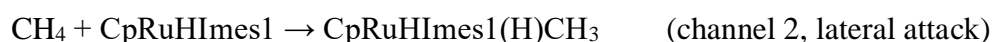

Indeed, in the case of methane activation without bifurcation, the IRC curve connects the transition state directly with the reactants' valley. In the opposite case, from the TS for C-H bond cleavage (Figure S13) the IRC calculations converge to another stationary point (Figure S13) with the relative energies about of 4.5 kcal/mol relative to the isolated Cp(L)RuH and CH<sub>4</sub>. In each case, the obtained in the IRC and verified next by conventional TS localization stationary point was assigned to be a saddle point characterized by a soft imaginary vibrational mode about of 21i cm<sup>-1</sup> with synchronous Cp ring rotation and CH<sub>4</sub> and Ru-H motion (Figure 3b).

Table S1. Energies of transition states relative to isolated reactants (CpRuHImes1 and CH<sub>4</sub>)

| without branching |       | with branching, kcal/mol |      |
|-------------------|-------|--------------------------|------|
| 1a                | 2a    | 1b                       | 2b   |
| 14.82             | 18.32 | 15.9                     | 15.5 |
| –                 | –     | 4.47                     | 4.54 |

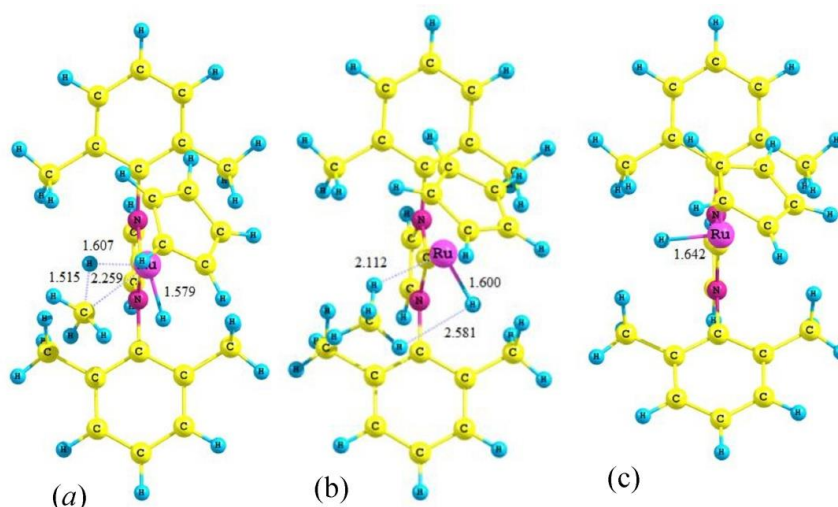

Figure S13. The transition state structure for the central attack with the branching in the reaction path (a), transition state in the branching in the reaction path (b), and the given comparison parental catalytic molecule (c). Bond lengths are given in Å.

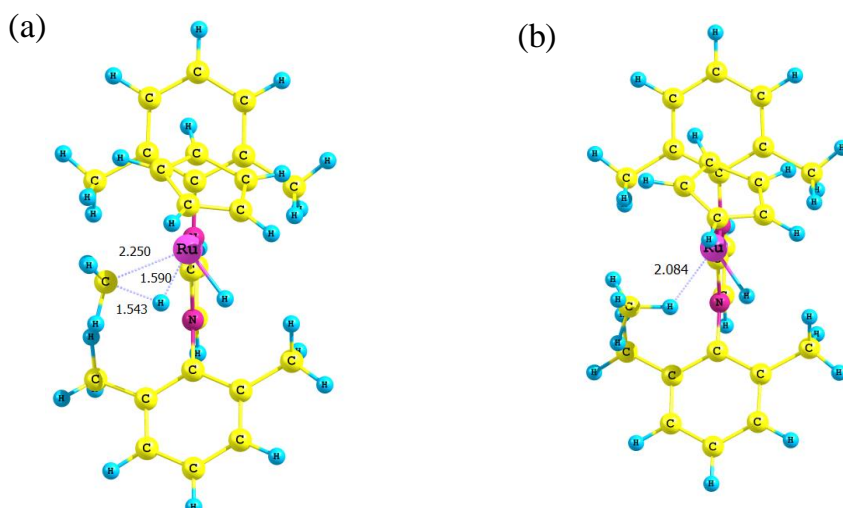

Figure S14. The transition state structure for the lateral attack with the branching in the reaction path (a) and transition state in the branching in the reaction path (b). Bond lengths are given in Å.

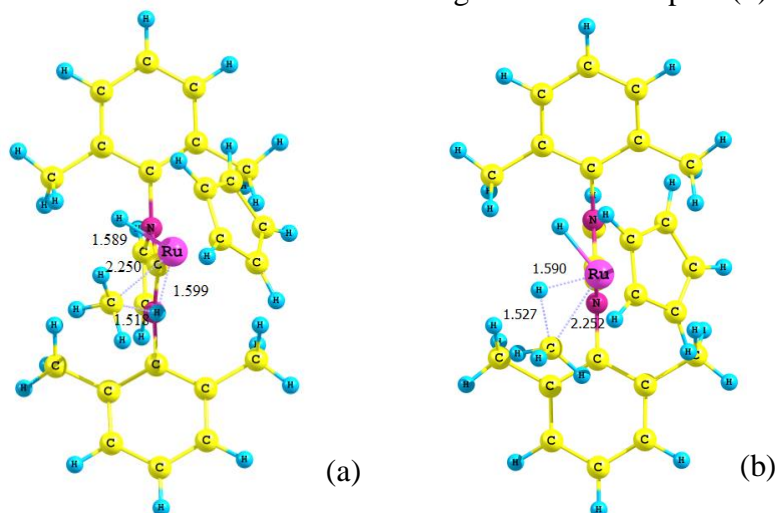

Figure S15. The transition state structure for the central (a) and lateral (b) attacks without branching in the reaction path. Bond lengths are given in Å.

For the paths 1a and 2a, i.e., without branching, the activation energies are 14.82 and 18.32 kcal/mol above isolated reactants, respectively. The activation energies of the corresponding channels 1b and 2b are 15.9 (15.8) and 15.5 (15.5) kcal/mol, respectively, where the data obtained at the B3LYP/A level are indicated in parentheses to be compared easily with those ones calculated at the

B3LYP/B theory level. Influence of expansion and augmentation of the basic sets for C/H/N was found to be negligible if the 6-311++G(d,p) and 6-31G(d,p) basis sets are considered.

The concept of the bifurcation points was introduced in [4-7]. More details related to the practical aspects were considered in [8-10].

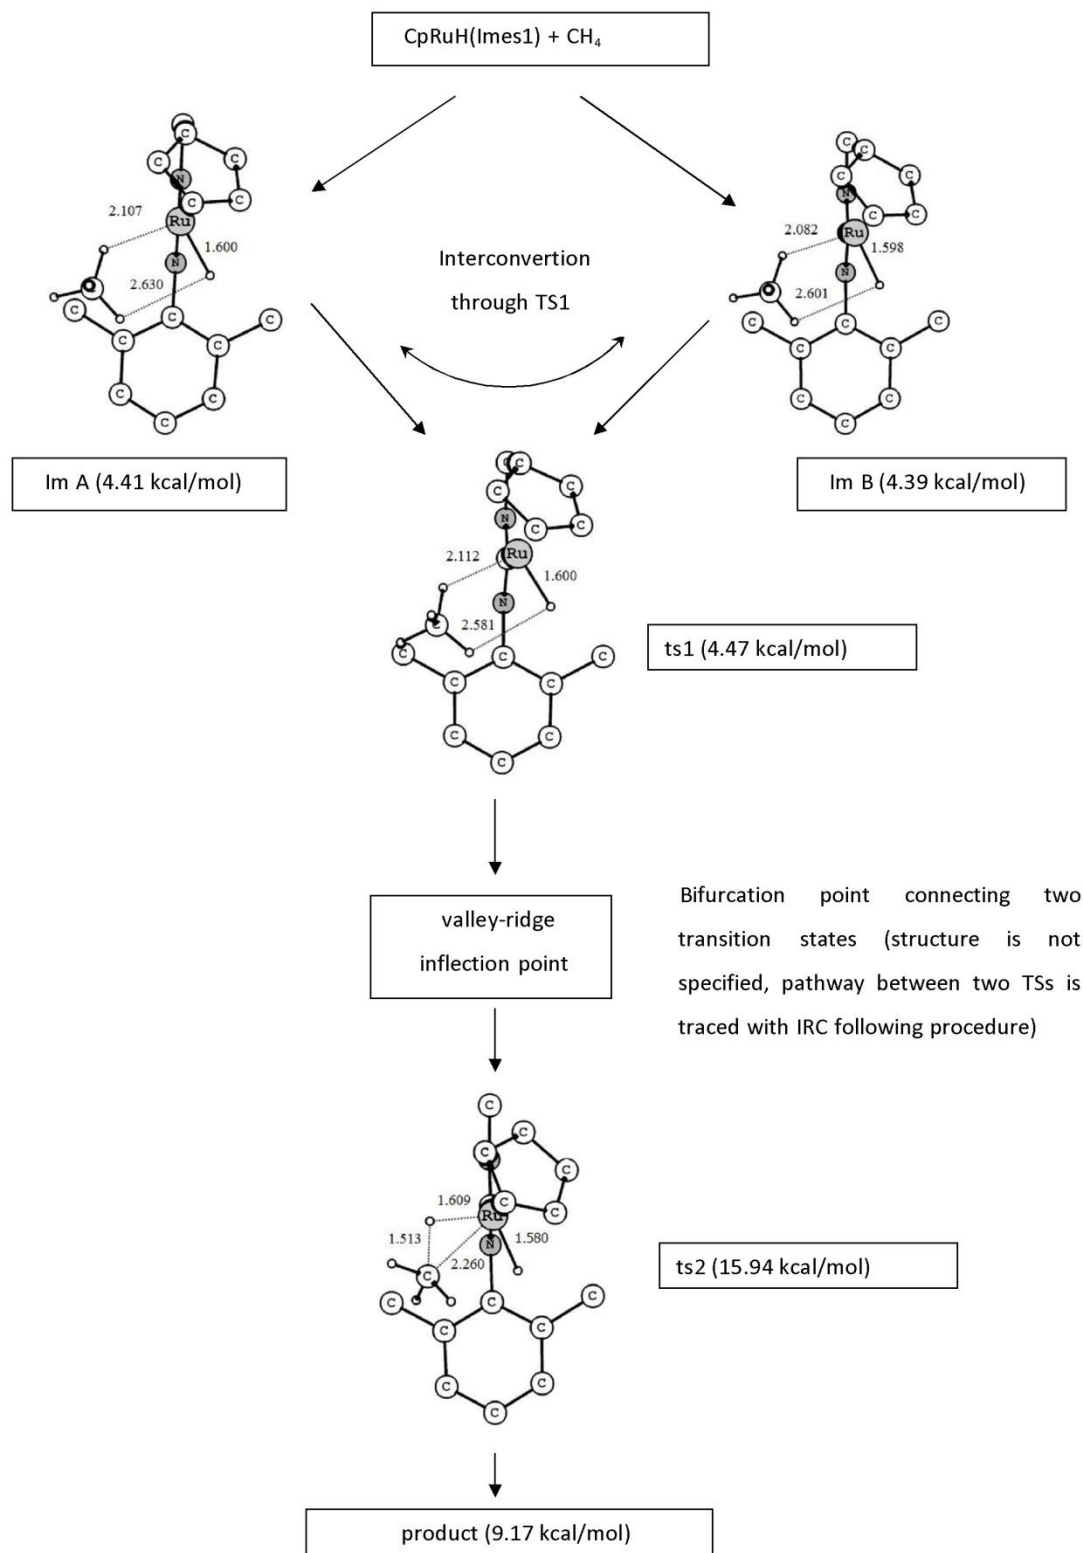

Figure S16. Central attack of CH<sub>4</sub> to Cp(L)(H)Ru occurring through the branching point.

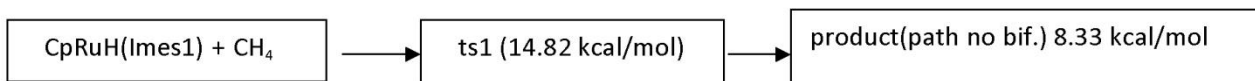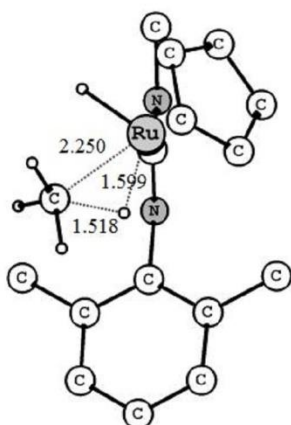

Figure S17. Central attack of CH<sub>4</sub> to Cp(L)(H)Ru occurring without reaction path branching.

2) For ethane also two paths, of lateral and central attacks, were revealed where addition occurs in a single step or two steps with an intermediate (Figure S18 and Table S2), as well as conformational isomers for different orientation of CH<sub>3</sub>-group in the ethane.

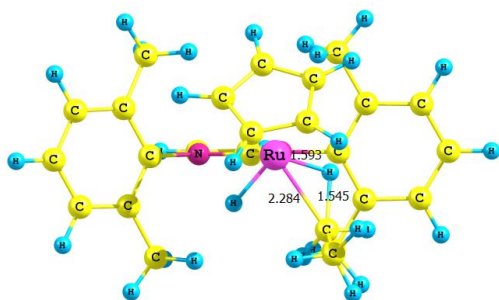

*path 1* – 1-TS1<sub>C2H6</sub>

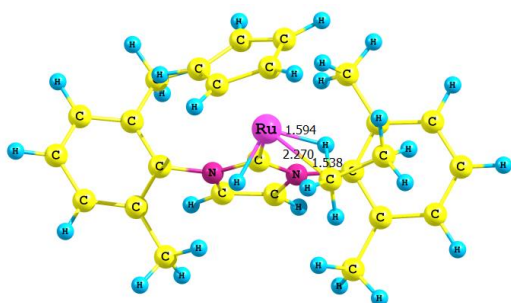

*path 1* – 1-TS2<sub>C2H6</sub>

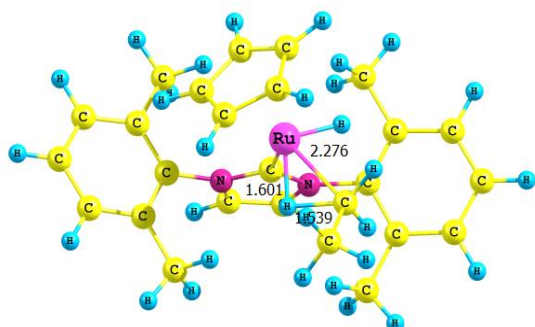

*path 1* – 1-TS3<sub>C2H6</sub>

*path 1* – 1-TS4<sub>C2H6</sub>



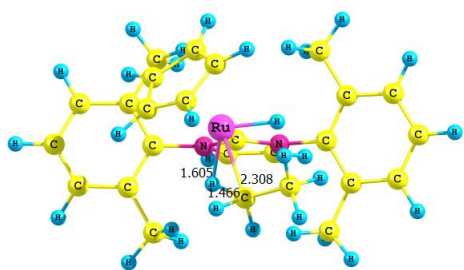

*path 2* – 2-TS1<sub>C2H6</sub>

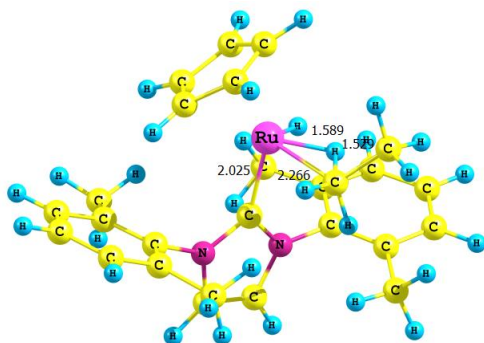

*path 2* – 2-TS2<sub>C2H6</sub>

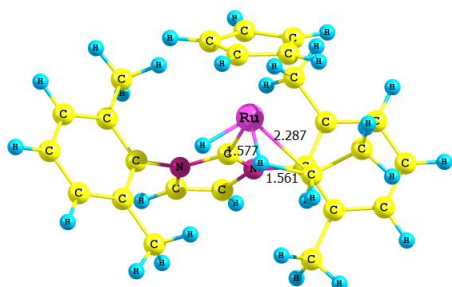

Figure S18. Transition states and ethane oxidative addition. Bond lengths are given in Å.

Table S2. Total (E<sub>tot</sub>) and relative (E<sub>rel</sub>(isolated reactants)) energies for transition states and complexes in the ethane addition reaction.

| <i>path 1</i> – <i>central attack</i><br><i>stationary point</i> | E <sub>tot</sub> , a.u.<br><br>(E <sub>rel</sub> (isolated reactants), kcal/mol) | <i>path 1</i> –<br><i>central attack</i><br><i>stationary point</i> | E <sub>tot</sub> , a.u.<br><br>(E <sub>rel</sub> (isolated reactants), kcal/mol) |
|------------------------------------------------------------------|----------------------------------------------------------------------------------|---------------------------------------------------------------------|----------------------------------------------------------------------------------|
| 1-TS1 <sub>C2H6</sub>                                            | -1213.406271<br><br>(17.78)                                                      | 1-TS2 <sub>C2H6</sub>                                               | -1213.408962<br><br>(16.09)                                                      |
| 1-TS3 <sub>C2H6</sub>                                            | -1213.407474                                                                     | 1-TS4 <sub>C2H6</sub>                                               | -1213.403527                                                                     |

|                                                                                                                    |                            |                                |                             |
|--------------------------------------------------------------------------------------------------------------------|----------------------------|--------------------------------|-----------------------------|
| complex, no bifurcation                                                                                            | (17.03)                    | complex, no bifurcation        | (19.50)                     |
| <i>path 2 – lateral attack</i>                                                                                     |                            | <i>path 2 – lateral attack</i> |                             |
| 2-TS1 <sub>C2H6</sub>                                                                                              | -1213.407569<br>(16.97)    | 2-TS2 <sub>C2H6</sub>          | -1213.397542<br><br>(23.26) |
| complex, no bifurcation<br><br>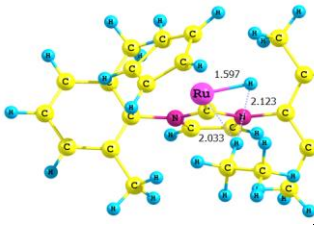 | -1213.427658<br><br>(4.36) |                                |                             |

3) For benzene, only the central attack was shown at the B3LYP/B theory level (Table S3 and Figure S17). The reaction is two-step, with two saddle points and one intermediate

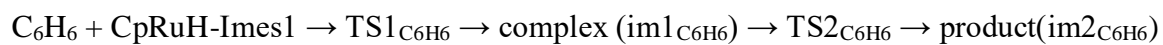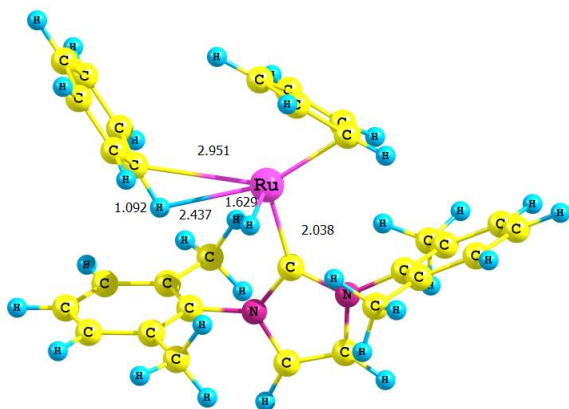

TS1<sub>C<sub>6</sub>H<sub>6</sub></sub>

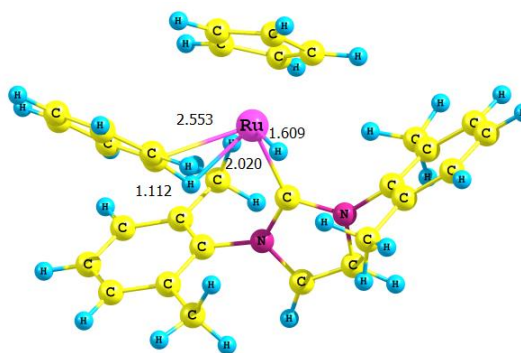

im1<sub>C<sub>6</sub>H<sub>6</sub></sub>

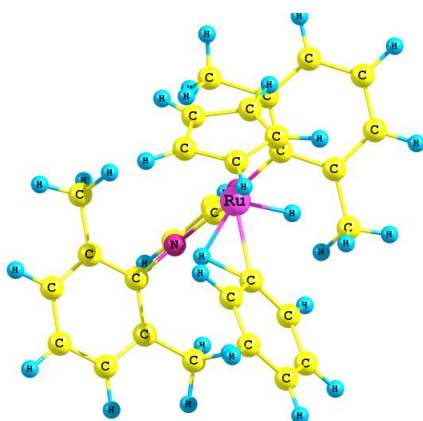

TS2<sub>C<sub>6</sub>H<sub>6</sub></sub>

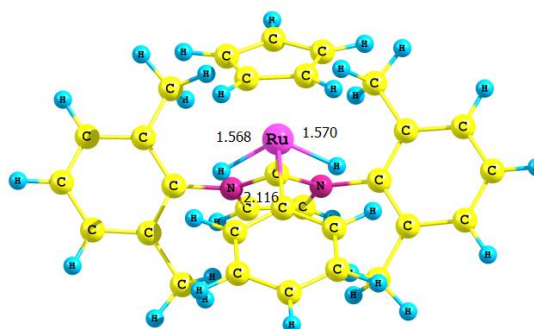

im2<sub>C<sub>6</sub>H<sub>6</sub></sub>

Figure S19 Transition states and intermediates for oxidative addition of benzene. Bond lengths are given in Å.

Table S3. Total (Etot) and relative (Erel(isolated reactants)) energies for transition states and complexes in the benzene addition reaction.

| Stationary point | Etot, a.u. (Erel(isolated reactants), kcal/mol) |
|------------------|-------------------------------------------------|
| <b>im2</b>       | -1365.844433 (6.05)                             |
| <b>TS2</b>       | -1365.837315 (10.51)                            |
| <b>im1</b>       | -1365.848369 (3.58)                             |
| <b>TS1</b>       | -1365.846854 (4.53)                             |

4) C-H activation in pyridine proceeds in two stages involving formation of intermediates shown in Chart S1. The energy profiles are shown in Figure S20.

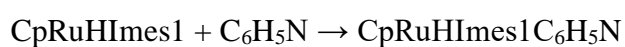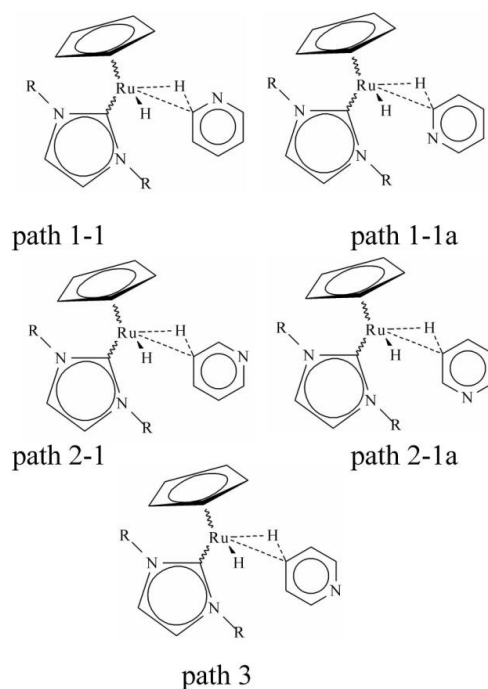

Chart S1. Transition states for various reaction channels of the oxidative addition of pyridine to CpRuH(Imes1).

Table S4. Stepwise reaction paths and corresponding activation energies calculated at the B3LYP/B theory level. Step 1 is activated generation of corresponding pre-reactive complex, step 2 is a catalytic oxidative addition.

| Reaction pathways | Activation energy, kcal/mol |              |
|-------------------|-----------------------------|--------------|
|                   | step 1                      | step 2       |
| <b>path 1-1</b>   | 5.26 (+1.54)                | 1.35         |
| <b>path 1-1a</b>  | 3.72                        | 4.08 (+2.73) |
| <b>path 2-1</b>   | 3.91 (+0.19)                | 5.60 (+4.25) |
| <b>path 2-1a</b>  | 4.24 (+0.52)                | 5.02 (+3.67) |
| <b>path 3</b>     | 4.33 (+0.61)                | 4.00 (+2.65) |

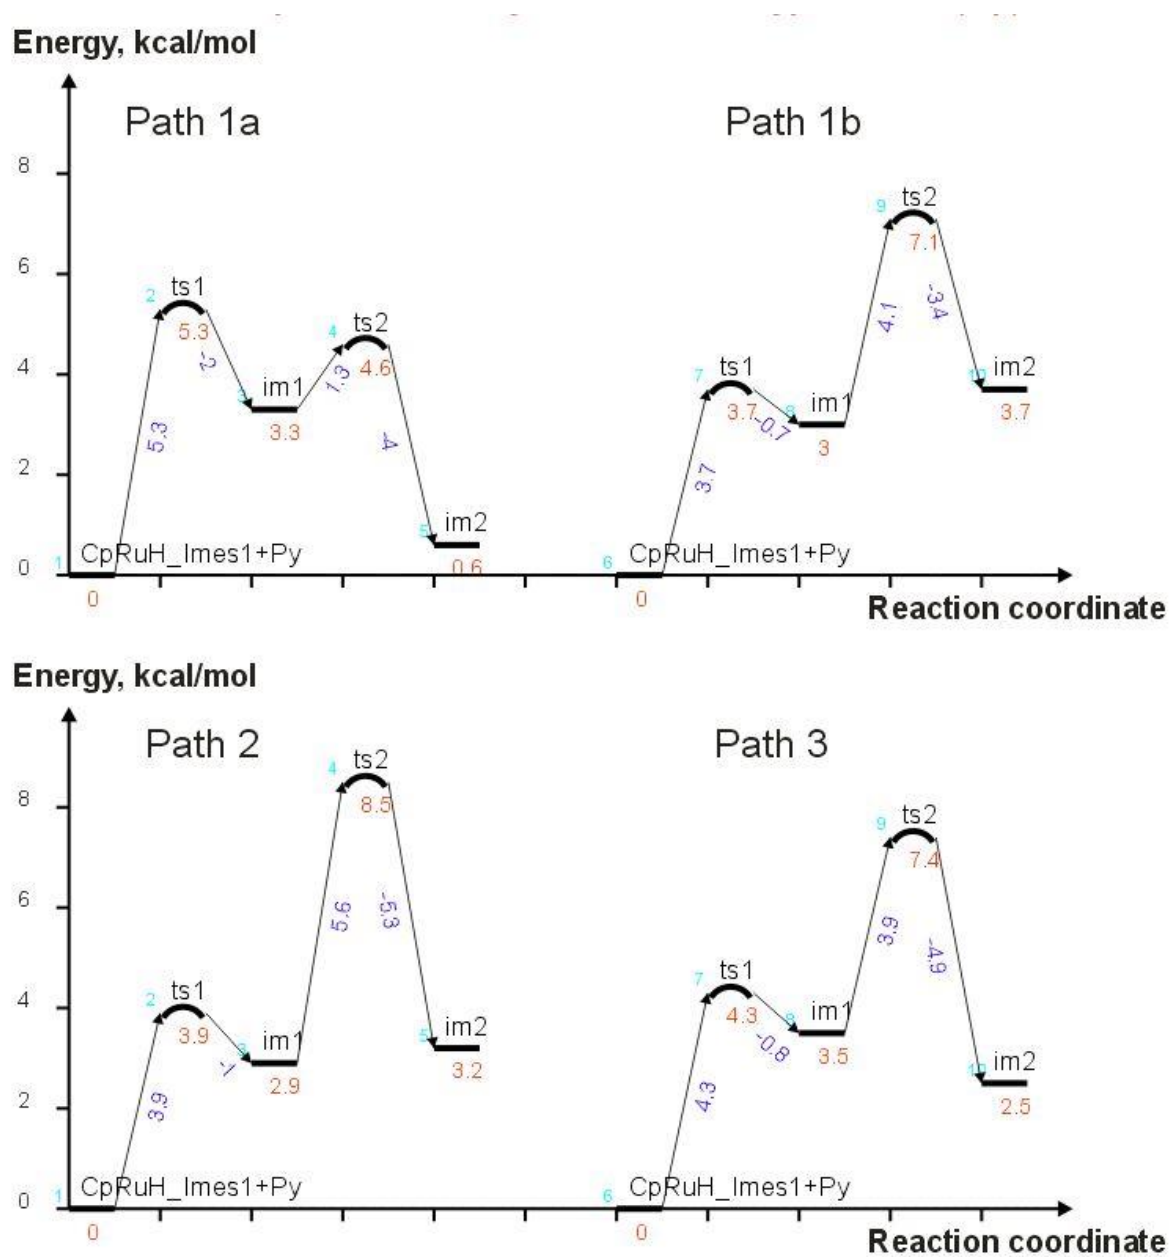

Figure S20. Relative energy profile for pyridine addition reaction catalyzed by Cp(L)RuH for the channels 1a, 1b, 2, and 3.

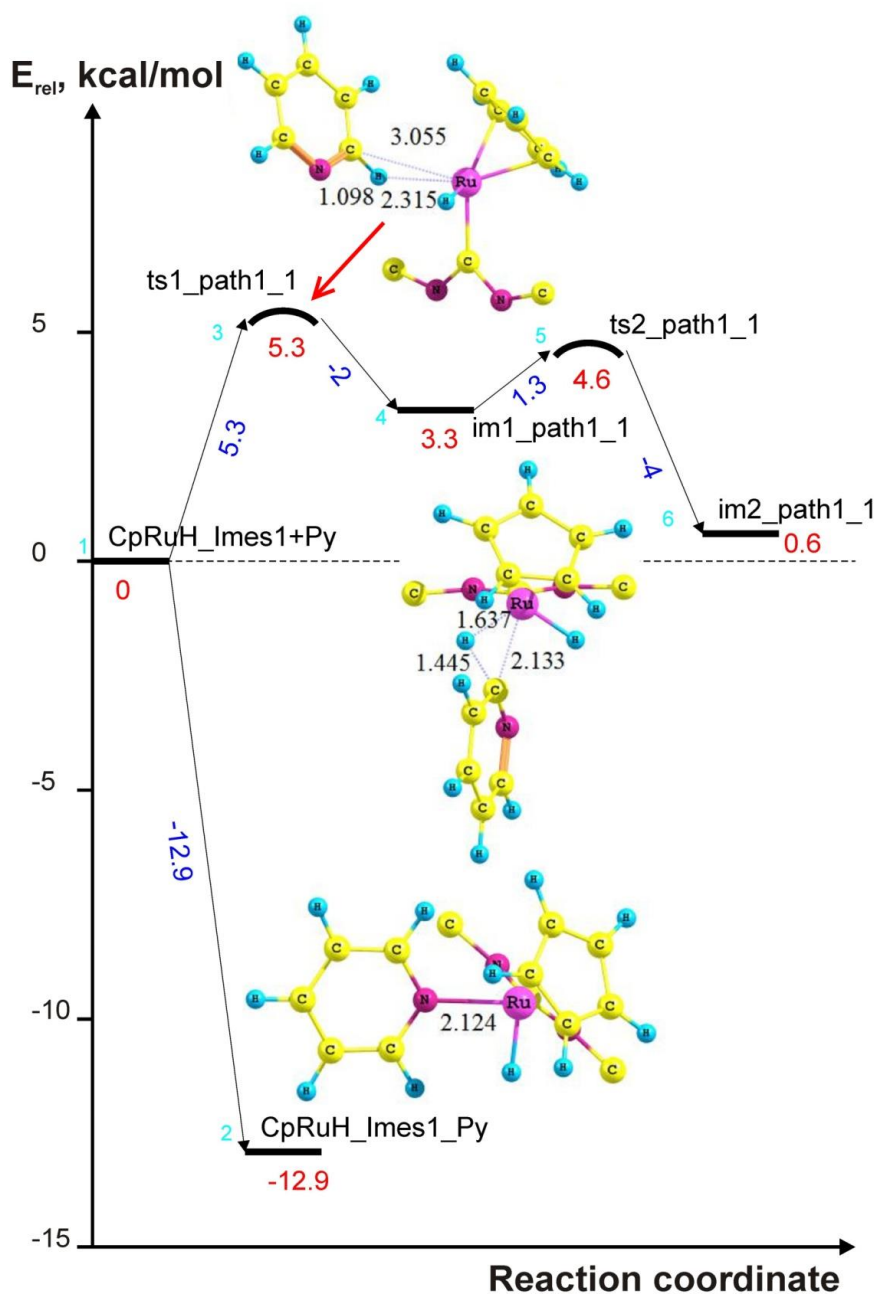

Figure S21. Relative energy profile for pyridine addition reaction catalyzed by Cp(L)RuH for the major and catalyst inhibition channels. The bond lengths are given in Å.

The inhibition of catalysis by added carbene was studied. We considered an associative pathway. Addition of the model carbene L to the intermediate **11** generates the bis(carbene) complex Cp(L)<sub>2</sub>RuH (**12**). Formation of **12** is an exothermic process ( $\Delta_r E = -3.70$  kcal/mol,  $\Delta_r G(50^\circ\text{C}) = 18.00$  kcal/mol).

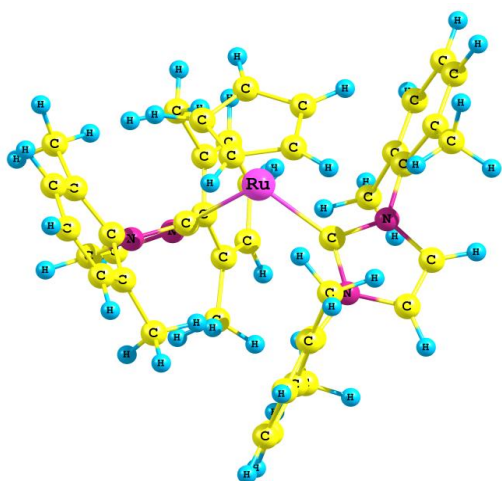

Figure S22. Bis(carbene) complex Cp(IMes)<sub>2</sub>RuH (**15**).



## 5. References

---

- <sup>1</sup> S. H. Lee, S. I. Gorelsky and G. I. Nikonov, *Organometallics*, 2013, **32**, 6599-6604.
- <sup>2</sup> V. H. Mai, L. G. Kuzmina, A. V. Churakov, I. Korobkov, J. A. K. Howard and G. I. Nikonov, *Dalton Transactions*, 2016, **45**, 208-215.
- <sup>3</sup> A. L. Osipov, D. V. Gutsulyak, L. G. Kuzmina, J. A. K. Howard, D. A. Lemenovskii, G. Suess-Fink and G. I. Nikonov, *J. Organomet. Chem.*, 2007, **692**, 5081-5085.
- <sup>4</sup> M. V. Basilevsky, A. G. Shamov, *Chem. Phys.*, 1981, **60**, 347-358.
- <sup>5</sup> M. V. Basilevsky, *Chem. Phys.*, 1982, **67**, 337-346.
- <sup>6</sup> M. V. Basilevsky, *J. Mol. Struct.*, 1983, **103**, 139-152.
- <sup>7</sup> M. V. Basilevsky, *Pure. Appl. Chem.*, 1988, **55**, 207-212.
- <sup>8</sup> O. B. Gadzhiev, S. K. Ignatov, A. G. Razuvaev and Artëm E. Masunov, *J. Phys. Chem. A*, 2009, **113**, 9092–9101.
- <sup>9</sup> O. B. Gadzhiev, P. G. Sennikov, A. I. Petrov, D. Gogova and D. Siche, *Cryst. Growth Des.*, 2013, **13**, 1445–1457.
- <sup>10</sup> O. B. Gadzhiev, P. G. Sennikov, A. I. Petrov, K. Kachel, S. Golka, D. Gogova and D. Siche, *J Mol Model.*, 2014, **20**, 2473-2485.
- <sup>11</sup> Frisch, M. J.; Trucks, G. W.; Schlegel, H. B.; Scuseria, G. E.; Robb, M. A.; Cheeseman, J. R.; Montgomery, J. A., Jr.; Vreven, T.; Kudin, K. N.; Burant, J. C.; Millam, J. M.; Iyengar, S. S.; Tomasi, J.; Barone, V.; Mennucci, B.; Cossi, M.; Scalmani, G.; Rega, N.; Petersson, G. A.; Nakatsuji, H.; Hada, M.; Ehara, M.; Toyota, K.; Fukuda, R.; Hasegawa, J.; Ishida, M.; Nakajima, T.; Honda, Y.; Kitao, O.; Nakai, H.; Klene, M.; Li, X.; Knox, J. E.; Hratchian, H. P.; Cross, J. B.; Bakken, V.; Adamo, C.; Jaramillo, J.; Gomperts, R.; Stratmann, R. E.; Yazyev, O.; Austin, A. J.; Cammi, R.; Pomelli, C.; Ochterski, J. W.; Ayala, P. Y.; Morokuma, K.; Voth, G. A.; Salvador, P.; Dannenberg, J. J.; Zakrzewski, V. G.; Dapprich, S.; Daniels, A. D.; Strain, M. C.; Farkas, O.; Malick, D. K.; Rabuck, A. D.; Raghavachari, K.; Foresman, J. B.; Ortiz, J. V.; Cui, Q.; Baboul, A. G.; Clifford, S.; Cioslowski, J.; Stefanov, B. B.; Liu, G.; Liashenko, A.; Piskorz, P.; Komaromi, I.; Martin, R. L.; Fox, D. J.; Keith, T.; Al-Laham, M. A.; Peng, C. Y.; Nanayakkara, A.; Challacombe, M.; Gill, P. M. W.; Johnson, B.; Chen, W.; Wong, M. W.; Gonzalez, C.; Pople, J. A. Gaussian 03, Version D.02; Gaussian, Inc.: Wallingford, CT, 2007.
